# Supplementary material for: Rapid Characterization of Chemical Components in Edible Mushroom Sparassis crispa by UPLC-Orbitrap MS Analysis and Potential Inhibitory Effects on Allergic Rhinitis
Source: PubMed Central journal article supplement (PMC6720900; doi:10.3390/molecules24163014), 2019-08-20
Supplement: molecules-24-03014-s001.pdf [file molecules-24-03014-s001.pdf]

**Table S1.** All the identified components from *Sparassis crispa* extracts and their UPLC-MS data.

| Peak No. | Retention time (min) | Positive ESI mode                                           |                  |                             | Negative ESI mode           |                  |                              | Exact mass | Formula                                                            | Identification                  | Confidence level <sup>a</sup> |
|----------|----------------------|-------------------------------------------------------------|------------------|-----------------------------|-----------------------------|------------------|------------------------------|------------|--------------------------------------------------------------------|---------------------------------|-------------------------------|
|          |                      | Adduct ion m/z                                              | Mass error (ppm) | Fragment ion m/z            | Adduct ion m/z              | Mass error (ppm) | Fragment ion m/z             |            |                                                                    |                                 |                               |
| 1        | 0.71                 | 175.1190 [M+H] <sup>+</sup>                                 | 0.558            | 158, 130, 116               | 173.1043 [M-H] <sup>-</sup> | -0.687           | -                            | 174.1117   | C <sub>6</sub> H <sub>14</sub> O <sub>2</sub> N <sub>4</sub>       | arginine                        | III                           |
| 2        | 0.76                 | 183.0864 [M+H] <sup>+</sup><br>205.0683 [M+Na] <sup>+</sup> | 0.521<br>0.198   | 165, 147, 129, 111          | 181.0716 [M-H] <sup>-</sup> | -0.836           | -                            | 182.0790   | C <sub>6</sub> H <sub>14</sub> O <sub>6</sub>                      | mannitol (6) <sup>b</sup>       | I                             |
| 3        | 0.80                 | -                                                           | -                | -                           | 191.0195 [M-H] <sup>-</sup> | -0.920           | 173, 129, 111, 85            | 192.0270   | C <sub>6</sub> H <sub>8</sub> O <sub>7</sub>                       | citric acid (2)                 | I                             |
| 4        | 1.05                 | 276.1554 [M+H] <sup>+</sup>                                 | 0.010            | 159, 144, 131, 120, 116, 88 | 274.1406 [M-H] <sup>-</sup> | -0.927           | -                            | 275.1481   | C <sub>11</sub> H <sub>21</sub> O <sub>5</sub> N <sub>3</sub>      | ethyl-L-glutaminyll-L-threonine | III                           |
| 5        | 1.07                 | -                                                           | -                | -                           | 147.0297 [M-H] <sup>-</sup> | -1.337           | 129, 115, 103                | 148.0372   | C <sub>5</sub> H <sub>8</sub> O <sub>5</sub>                       | ribono-1,4-lactone              | III                           |
| 6        | 1.31                 | 207.0499 [M+H] <sup>+</sup>                                 | 0.052            | -                           | 205.0352 [M-H] <sup>-</sup> | -1.004           | 173, 155, 143, 111           | 206.0427   | C <sub>7</sub> H <sub>10</sub> O <sub>7</sub>                      | citric acid monomethyl ester    | III                           |
| 7        | 1.49                 | -                                                           | -                | -                           | 147.0661 [M-H] <sup>-</sup> | -1.238           | 129, 101                     | 148.0736   | C <sub>6</sub> H <sub>12</sub> O <sub>4</sub>                      | mevalonic acid                  | III                           |
| 8        | 1.69                 | -                                                           | -                | -                           | 131.0348 [M-H] <sup>-</sup> | -0.109           | 113                          | 132.0423   | C <sub>5</sub> H <sub>8</sub> O <sub>4</sub>                       | methylsuccinic acid             | III                           |
| 9        | 2.44                 | -                                                           | -                | -                           | 145.0505 [M-H] <sup>-</sup> | 0.911            | 127, 101                     | 146.0579   | C <sub>6</sub> H <sub>10</sub> O <sub>4</sub>                      | 3-methylglutaric acid           | III                           |
| 10       | 2.61                 | 185.0809 [M+H] <sup>+</sup><br>207.0629 [M+Na] <sup>+</sup> | 0.457<br>0.338   | 141, 109                    | -                           | -                | -                            | 184.0736   | C <sub>9</sub> H <sub>12</sub> O <sub>4</sub>                      | crispacolide                    | III                           |
| 11       | 2.64                 | -                                                           | -                | -                           | 211.0247 [M-H] <sup>-</sup> | -0.717           | 193, 165                     | 212.0321   | C <sub>9</sub> H <sub>8</sub> O <sub>6</sub>                       | sparalide B                     | III                           |
| 12       | 2.65                 | 298.0967 [M+H] <sup>+</sup>                                 | -0.425           | 280, 262, 136               | 296.0820 [M-H] <sup>-</sup> | -1.058           | -                            | 297.0896   | C <sub>11</sub> H <sub>15</sub> O <sub>3</sub> N <sub>5</sub><br>S | 5'-deoxy-5'-methylthioadenosine | III                           |
| 13       | 2.74                 | 229.1548 [M+H] <sup>+</sup>                                 | -0.572           | -                           | 227.1400 [M-H] <sup>-</sup> | -0.510           | 183, 168, 152, 139, 124, 114 | 228.1474   | C <sub>11</sub> H <sub>20</sub> O <sub>3</sub> N <sub>2</sub>      | leucylproline                   | III                           |
| 14       | 2.90                 | -                                                           | -                | -                           | 211.0247 [M-H] <sup>-</sup> | -0.290           | 193, 165                     | 212.0321   | C <sub>9</sub> H <sub>8</sub> O <sub>6</sub>                       | hanabiratakeliide C             | III                           |
| 15       | 3.00                 | -                                                           | -                | -                           | 195.0298 [M-H] <sup>-</sup> | -0.649           | 165                          | 196.0372   | C <sub>9</sub> H <sub>8</sub> O <sub>5</sub>                       | hanabiratakeliide B             | III                           |

| Peak No. | Retention time (min) | Positive ESI mode                                           |                  |                                        | Negative ESI mode                                           |                  |                              | Exact mass | Formula                                                       | Identification                             | Confidence level <sup>a</sup> |
|----------|----------------------|-------------------------------------------------------------|------------------|----------------------------------------|-------------------------------------------------------------|------------------|------------------------------|------------|---------------------------------------------------------------|--------------------------------------------|-------------------------------|
|          |                      | Adduct ion m/z                                              | Mass error (ppm) | Fragment ion m/z                       | Adduct ion m/z                                              | Mass error (ppm) | Fragment ion m/z             |            |                                                               |                                            |                               |
| 16       | 3.30                 | -                                                           | -                | -                                      | 188.0927 [M-H] <sup>-</sup>                                 | -0.698           | 144, 116                     | 189.1001   | C <sub>8</sub> H <sub>15</sub> O <sub>4</sub> N               | 2-aminooctanedioic acid                    | III                           |
| 17       | 3.33                 | -                                                           | -                | -                                      | 195.0298 [M-H] <sup>-</sup><br>391.0669 [2M-H] <sup>-</sup> | -0.547<br>-0.358 | 177, 149                     | 196.0372   | C <sub>9</sub> H <sub>8</sub> O <sub>5</sub>                  | sparalide C                                | III                           |
| 18       | 3.48                 | 183.0652 [M+H] <sup>+</sup>                                 | 0.244            | -                                      | 181.0506 [M-H] <sup>-</sup>                                 | -0.453           | 123, 95, 67                  | 182.0579   | C <sub>9</sub> H <sub>10</sub> O <sub>4</sub>                 | methyl-2, 4-dihydroxy-6-methylbenzoate     | III                           |
| 19       | 3.54                 | -                                                           | -                | -                                      | 195.0298 [M-H] <sup>-</sup>                                 | -0.495           | 177, 149                     | 196.0372   | C <sub>9</sub> H <sub>8</sub> O <sub>5</sub>                  | hanabiratakeli A                           | III                           |
| 20       | 3.70                 | 181.0497 [M+H] <sup>+</sup>                                 | 0.634            | -                                      | 179.0349 [M-H] <sup>-</sup>                                 | -0.235           | 149                          | 180.0423   | C <sub>9</sub> H <sub>8</sub> O <sub>4</sub>                  | 5-hydroxy-7-methoxyphthalide               | III                           |
| 21       | 3.84                 | -                                                           | -                | -                                      | 311.0773 [M-H] <sup>-</sup>                                 | 0.191            | 293, 275, 245, 179, 149, 97  | 312.0854   | C <sub>14</sub> H <sub>16</sub> O <sub>8</sub>                | sparalide A                                | III                           |
| 22       | 3.97                 | 377.1459 [M+H] <sup>+</sup>                                 | 0.820            | 359, 341, 243, 99                      | 375.1310 [M-H] <sup>-</sup>                                 | 0.006            | -                            | 376.1383   | C <sub>17</sub> H <sub>20</sub> O <sub>6</sub> N <sub>4</sub> | riboflavin (1)                             | I                             |
| 23       | 4.08                 | 211.0602 [M+H] <sup>+</sup><br>233.0421 [M+Na] <sup>+</sup> | 0.616<br>0.281   | 193, 165                               | 209.0456 [M-H] <sup>-</sup>                                 | 0.303            | 191, 163                     | 210.0528   | C <sub>10</sub> H <sub>10</sub> O <sub>5</sub>                | 6-hydroxy-5,7-dimethoxyphthalide           | III                           |
| 24       | 4.18                 | 211.0601 [M+H] <sup>+</sup><br>233.0421 [M+Na] <sup>+</sup> | 0.001<br>0.109   | 193, 165                               | 209.0455 [M-H] <sup>-</sup>                                 | 0.016            | 191, 163                     | 210.0528   | C <sub>10</sub> H <sub>10</sub> O <sub>5</sub>                | 4-hydroxy-5,7-dimethoxy-1-isobenzofuranone | III                           |
| 25       | 4.57                 | 251.1278 [M+H] <sup>+</sup><br>273.1095 [M+Na] <sup>+</sup> | 0.257<br>-0.953  | 233, 215, 205, 197, 187, 169, 159, 145 | -                                                           | -                | -                            | 250.1200   | C <sub>14</sub> H <sub>18</sub> O <sub>4</sub>                | ainsliatone A (3)                          | I                             |
| 26       | 4.67                 | -                                                           | -                | -                                      | 173.0817 [M-H] <sup>-</sup>                                 | 1.341            | 129, 111                     | 174.0892   | C <sub>8</sub> H <sub>14</sub> O <sub>4</sub>                 | suberic acid                               | III                           |
| 27       | 4.75                 | 345.1181 [M+H] <sup>+</sup>                                 | 0.352            | -                                      | 343.1033 [M-H] <sup>-</sup>                                 | -0.453           | 285, 257, 195, 167, 137, 109 | 344.1107   | C <sub>15</sub> H <sub>20</sub> O <sub>9</sub>                | sparoside A                                | III                           |

| Peak No. | Retention time (min) | Positive ESI mode           |                  |                         | Negative ESI mode           |                  |                                     | Exact mass | Formula                                                       | Identification                                  | Confidence level <sup>a</sup> |
|----------|----------------------|-----------------------------|------------------|-------------------------|-----------------------------|------------------|-------------------------------------|------------|---------------------------------------------------------------|-------------------------------------------------|-------------------------------|
|          |                      | Adduct ion m/z              | Mass error (ppm) | Fragment ion m/z        | Adduct ion m/z              | Mass error (ppm) | Fragment ion m/z                    |            |                                                               |                                                 |                               |
| 28       | 5.18                 | 213.0756 [M+H] <sup>+</sup> | -0.657           | 185, 157, 155, 127, 99  | 211.0611 [M-H] <sup>-</sup> | -0.553           | -                                   | 212.0685   | C <sub>10</sub> H <sub>12</sub> O <sub>5</sub>                | methyl 2,4-dihydroxy-3-methoxy-6-methylbenzoate | III                           |
| 29       | 5.35                 | 181.0495 [M+H] <sup>+</sup> | -0.471           | 151                     | 179.0348 [M-H] <sup>-</sup> | -0.570           | 149                                 | 180.0423   | C <sub>9</sub> H <sub>8</sub> O <sub>4</sub>                  | 5-methoxy-7-hydroxyphthalide                    | III                           |
| 30       | 5.41                 | 213.0757 [M+H] <sup>+</sup> | -0.328           | 155, 127                | 211.0612 [M-H] <sup>-</sup> | 0.158            | -                                   | 212.0685   | C <sub>10</sub> H <sub>12</sub> O <sub>5</sub>                | methyl dihydroxymethoxy-methylbenzoate          | III                           |
| 31       | 5.69                 | 195.0652 [M+H] <sup>+</sup> | 0.075            | 165, 135                | -                           | -                | -                                   | 194.0579   | C <sub>10</sub> H <sub>10</sub> O <sub>4</sub>                | meconin                                         | III                           |
| 32       | 5.70                 | 195.0651 [M+H] <sup>+</sup> | -0.232           | 165, 135                | -                           | -                | -                                   | 194.0579   | C <sub>10</sub> H <sub>10</sub> O <sub>4</sub>                | 5,7-dimethoxyphthalide                          | III                           |
| 33       | 6.35                 | 197.0809 [M+H] <sup>+</sup> | 0.125            | 169, 139, 111           | -                           | -                | -                                   | 196.0736   | C <sub>10</sub> H <sub>12</sub> O <sub>4</sub>                | sparassol                                       | III                           |
| 34       | 6.42                 | -                           | -                | -                       | 181.0717 [M-H] <sup>-</sup> | -0.394           | 163, 149, 131, 119, 101, 89, 71, 59 | 182.0790   | C <sub>6</sub> H <sub>14</sub> O <sub>6</sub>                 | glucitol                                        | III                           |
| 35       | 6.72                 | -                           | -                | -                       | 181.0716 [M-H] <sup>-</sup> | -                | 163, 131, 119, 101                  | 182.0790   | C <sub>6</sub> H <sub>14</sub> O <sub>6</sub>                 | dulcitol                                        | III                           |
| 36       | 6.83                 | 218.2115 [M+H] <sup>+</sup> | 0.157            | 200, 174, 156, 130, 106 | -                           | -                | -                                   | 217.2042   | C <sub>12</sub> H <sub>27</sub> O <sub>2</sub> N              | 2-amino-1,3-dodecanediol                        | III                           |
| 37       | 6.85                 | 655.3084 [M+H] <sup>+</sup> | -0.295           | 343, 315, 244, 226, 112 | 653.2943 [M-H] <sup>-</sup> | 0.398            | -                                   | 654.3013   | C <sub>32</sub> H <sub>42</sub> O <sub>9</sub> N <sub>6</sub> | stellarin C                                     | III                           |
| 38       | 6.97                 | -                           | -                | -                       | 201.1131 [M-H] <sup>-</sup> | -0.658           | 183, 139                            | 202.1205   | C <sub>10</sub> H <sub>18</sub> O <sub>4</sub>                | 3-tert-butyladipic acid                         | III                           |
| 39       | 7.15                 | 262.2377 [M+H] <sup>+</sup> | 0.113            | 244, 226, 136, 118, 100 | -                           | -                | -                                   | 261.2304   | C <sub>14</sub> H <sub>31</sub> O <sub>3</sub> N              | 2-amino-1,3,4-tetradecanetriol                  | III                           |

| Peak No. | Retention time (min) | Positive ESI mode           |                  |                            | Negative ESI mode           |                  |                    | Exact mass | Formula                                          | Identification                                                             | Confidence level <sup>a</sup> |
|----------|----------------------|-----------------------------|------------------|----------------------------|-----------------------------|------------------|--------------------|------------|--------------------------------------------------|----------------------------------------------------------------------------|-------------------------------|
|          |                      | Adduct ion m/z              | Mass error (ppm) | Fragment ion m/z           | Adduct ion m/z              | Mass error (ppm) | Fragment ion m/z   |            |                                                  |                                                                            |                               |
| 40       | 7.25                 | 376.2483 [M+H] <sup>+</sup> | 0.146            | 360, 332, 316, 288         | 374.2336 [M-H] <sup>-</sup> | -0.112           | -                  | 375.2410   | C <sub>22</sub> H <sub>33</sub> O <sub>4</sub> N | tuberostemonine                                                            | III                           |
| 41       | 7.60                 | 436.2693 [M+H] <sup>+</sup> | -0.170           | -                          | 434.2552 [M-H] <sup>-</sup> | 0.803            | 416, 398, 206, 193 | 435.2621   | C <sub>24</sub> H <sub>37</sub> O <sub>6</sub> N | salternamide D                                                             | III                           |
| 42       | 7.69                 | 393.2068 [M+H] <sup>+</sup> | 1.994            | 365, 337, 309              | -                           | -                | -                  | 392.1988   | C <sub>25</sub> H <sub>28</sub> O <sub>4</sub>   | xanthoangelol                                                              | III                           |
| 43       | 7.87                 | 293.2110 [M+H] <sup>+</sup> | -0.516           | 275, 233, 177, 151, 99, 71 | -                           | -                | -                  | 292.2083   | C <sub>18</sub> H <sub>28</sub> O <sub>3</sub>   | 9-hydroxy-10,14-octadecadien-12-ynoic acid                                 | III                           |
| 44       | 8.09                 | 459.3104 [M+H] <sup>+</sup> | -0.307           | 441, 423, 277, 259, 241    | -                           | -                | -                  | 458.3032   | C <sub>28</sub> H <sub>42</sub> O <sub>5</sub>   | strophasterol C                                                            | III                           |
| 45       | 8.20                 | 556.3052 [M+H] <sup>+</sup> | -1.024           | 496, 434, 394, 374, 324    | 554.2906 [M-H] <sup>-</sup> | 0.884            | -                  | 555.2985   | C <sub>35</sub> H <sub>41</sub> O <sub>5</sub> N | 3-(acetyloxy)-17-(benzoyloxy)-7-[O-(phenylmethyl)oxime] androst-5-en-7-one | III                           |
| 46       | 8.33                 | 267.1590 [M+H] <sup>+</sup> | -0.433           | -                          | 265.1444 [M-H] <sup>-</sup> | -0.575           | 247                | 266.1518   | C <sub>15</sub> H <sub>22</sub> O <sub>4</sub>   | clitocybulol C                                                             | III                           |
| 47       | 8.45                 | 295.2266 [M+H] <sup>+</sup> | -0.411           | 277, 221                   | 293.2120 [M-H] <sup>-</sup> | -0.710           | 275                | 294.2195   | C <sub>18</sub> H <sub>30</sub> O <sub>3</sub>   | 3β-hydroxy-11,12-O-isopropylidenedrimene                                   | III                           |
| 48       | 8.48                 | -                           | -                | -                          | 329.2331 [M-H] <sup>-</sup> | -0.751           | 229, 211, 171, 139 | 330.2406   | C <sub>18</sub> H <sub>34</sub> O <sub>5</sub>   | 9,12,13-trihydroxy-15-octadecenoic acid                                    | III                           |
| 49       | 8.61                 | 277.2161 [M+H] <sup>+</sup> | -0.529           | -                          | 275.2016 [M-H] <sup>-</sup> | -0.194           | 231                | 276.2089   | C <sub>18</sub> H <sub>28</sub> O <sub>2</sub>   | morocetic acid                                                             | III                           |
| 50       | 8.77                 | 332.1847 [M+H] <sup>+</sup> | -2.754           | 274, 264, 206              | -                           | -                | -                  | 331.1784   | C <sub>19</sub> H <sub>25</sub> O <sub>4</sub> N | antrodin D                                                                 | III                           |
| 51       | 8.79                 | 339.1597 [M+H] <sup>+</sup> | 1.811            | 311, 283, 251              | -                           | -                | -                  | 358.1518   | C <sub>21</sub> H <sub>22</sub> O <sub>4</sub>   | 4-hydroxyderricin                                                          | III                           |

| Peak No. | Retention time (min) | Positive ESI mode           |                  |                    | Negative ESI mode           |                  |                                   | Exact mass | Formula                                                       | Identification                                                                     | Confidence level <sup>a</sup> |
|----------|----------------------|-----------------------------|------------------|--------------------|-----------------------------|------------------|-----------------------------------|------------|---------------------------------------------------------------|------------------------------------------------------------------------------------|-------------------------------|
|          |                      | Adduct ion m/z              | Mass error (ppm) | Fragment ion m/z   | Adduct ion m/z              | Mass error (ppm) | Fragment ion m/z                  |            |                                                               |                                                                                    |                               |
| 52       | 8.99                 | 526.3309 [M+H] <sup>+</sup> | -1.217           | -                  | 524.3160 [M-H] <sup>-</sup> | 1.706            | 508, 506, 492, 490, 474, 360, 257 | 525.3243   | C <sub>35</sub> H <sub>43</sub> O <sub>3</sub> N              | 1-(18-benzamido-3β-hydroxy-5α-androstan-17β-yl)-3-phenyl-2-propen-1-one            | III                           |
| 53       | 9.11                 | 181.1223 [M+H] <sup>+</sup> | -0.035           | 153, 149, 121      | -                           | -                | -                                 | 180.1150   | C <sub>11</sub> H <sub>16</sub> O <sub>2</sub>                | butylated hydroxyanisole                                                           | III                           |
| 54       | 9.31                 | 353.2298 [M+H] <sup>+</sup> | 0.665            | 337, 335, 321, 303 | 351.2155 [M-H] <sup>-</sup> | 1.446            | -                                 | 352.2223   | C <sub>16</sub> H <sub>28</sub> O <sub>3</sub> N <sub>6</sub> | 3-cyclohexene-1-butylaldehyde-3-hydroxy-α-isopropyl-1-methyl-2-oxo-disemicarbazone | III                           |
| 55       | 9.69                 | 313.2374 [M+H] <sup>+</sup> | 0.204            | -                  | 311.2227 [M-H] <sup>-</sup> | -0.394           | 293, 249, 171                     | 312.2301   | C <sub>18</sub> H <sub>32</sub> O <sub>4</sub>                | 5,8-dihydroxy-9,12-octadecadienoic acid                                            | III                           |
| 56       | 9.86                 | -                           | -                | -                  | 267.1599 [M-H] <sup>-</sup> | -1.057           | 249, 223                          | 268.1675   | C <sub>15</sub> H <sub>24</sub> O <sub>4</sub>                | ustusol B                                                                          | III                           |
| 57       | 10.34                | -                           | -                | -                  | 265.1447 [M-H] <sup>-</sup> | 0.632            | 244                               | 266.1518   | C <sub>15</sub> H <sub>22</sub> O <sub>4</sub>                | 3-hydroxy-(4,2-hydroxy-6-methyl)-2 heptyl benzoic acid                             | III                           |
| 58       | 10.56                | 311.2216 [M+H] <sup>+</sup> | -0.405           | 293, 275, 257, 223 | 309.2070 [M-H] <sup>-</sup> | -0.429           | 291, 273, 209, 185, 99            | 310.2144   | C <sub>18</sub> H <sub>30</sub> O <sub>4</sub>                | porrigenic acid                                                                    | III                           |

| Peak No. | Retention time (min) | Positive ESI mode           |                  |                              | Negative ESI mode           |                  |                        | Exact mass | Formula                                          | Identification                                   | Confidence level <sup>a</sup> |
|----------|----------------------|-----------------------------|------------------|------------------------------|-----------------------------|------------------|------------------------|------------|--------------------------------------------------|--------------------------------------------------|-------------------------------|
|          |                      | Adduct ion m/z              | Mass error (ppm) | Fragment ion m/z             | Adduct ion m/z              | Mass error (ppm) | Fragment ion m/z       |            |                                                  |                                                  |                               |
| 59       | 10.63                | 330.1707 [M+H] <sup>+</sup> | 2.015            | 272, 262, 204                | -                           | -                | -                      | 329.1627   | C <sub>19</sub> H <sub>23</sub> O <sub>4</sub> N | antrodin C                                       | III                           |
| 60       | 10.70                | 293.2109 [M+H] <sup>+</sup> | -0.755           | 275, 229, 177, 161, 151, 133 | -                           | -                | -                      | 292.2038   | C <sub>18</sub> H <sub>28</sub> O <sub>3</sub>   | 12-oxo-phytodienoic acid                         | III                           |
| 61       | 11.34                | 233.1171 [M+H] <sup>+</sup> | -0.390           | 215, 197, 187, 169, 159, 95  | -                           | -                | -                      | 232.1094   | C <sub>14</sub> H <sub>16</sub> O <sub>3</sub>   | fraxinellone (5)                                 | I                             |
| 62       | 11.36                | -                           | -                | -                            | 415.2112 [M-H] <sup>-</sup> | -0.735           | 119                    | 414.2042   | C <sub>24</sub> H <sub>30</sub> O <sub>6</sub>   | armillarin                                       | III                           |
| 63       | 12.12                | 337.2736 [M+H] <sup>+</sup> | -0.479           | 293, 275                     | -                           | -                | -                      | 336.2664   | C <sub>21</sub> H <sub>36</sub> O <sub>3</sub>   | 3-methyl-5-pentyl-2-furanundecanoic acid         | III                           |
| 64       | 12.51                | -                           | -                | -                            | 649.3440 [M-H] <sup>-</sup> | 1.551            | 562, 341, 323, 279, 87 | 650.3514   | C <sub>31</sub> H <sub>54</sub> O <sub>14</sub>  | nicandrose E                                     | III                           |
| 65       | 12.78                | 315.2530 [M+H] <sup>+</sup> | -0.083           | -                            | 313.2383 [M-H] <sup>-</sup> | -0.296           | 295, 277, 201, 183     | 314.2457   | C <sub>18</sub> H <sub>34</sub> O <sub>4</sub>   | 1,3-di(isobutoxycarbonyl)-2,4,4-trimethylpentane | III                           |
| 66       | 12.92                | 318.3002 [M+H] <sup>+</sup> | -0.316           | 300, 282, 264, 68            | -                           | -                | -                      | 317.2930   | C <sub>18</sub> H <sub>39</sub> O <sub>3</sub> N | 2-amino-1,3,4-trihydroxyoctadecane               | III                           |
| 67       | 13.13                | -                           | -                | -                            | 295.2275 [M-H] <sup>-</sup> | -1.111           | 277, 251, 228, 183     | 296.2351   | C <sub>18</sub> H <sub>32</sub> O <sub>3</sub>   | 10-hydroxy-8,12-octadecadienoic acid             | III                           |
| 68       | 13.31                | 279.2317 [M+H] <sup>+</sup> | -0.561           | 235                          | -                           | -                | -                      | 278.2246   | C <sub>18</sub> H <sub>30</sub> O <sub>2</sub>   | α-eleostearic acid                               | III                           |
| 69       | 13.49                | -                           | -                | -                            | 295.2276 [M-H] <sup>-</sup> | -0.908           | 277, 251, 228, 183     | 296.2351   | C <sub>18</sub> H <sub>32</sub> O <sub>3</sub>   | 8-oxo-9-octadecenoic acid                        | III                           |

| Peak No. | Retention time (min) | Positive ESI mode           |                  |                                                                 | Negative ESI mode           |                  |                         | Exact mass | Formula                                        | Identification                                                              | Confidence level <sup>a</sup> |
|----------|----------------------|-----------------------------|------------------|-----------------------------------------------------------------|-----------------------------|------------------|-------------------------|------------|------------------------------------------------|-----------------------------------------------------------------------------|-------------------------------|
|          |                      | Adduct ion m/z              | Mass error (ppm) | Fragment ion m/z                                                | Adduct ion m/z              | Mass error (ppm) | Fragment ion m/z        |            |                                                |                                                                             |                               |
| 70       | 14.05                | -                           | -                | -                                                               | 489.3066 [M-H] <sup>-</sup> | -0.667           | 279                     | 490.3142   | C <sub>25</sub> H <sub>46</sub> O <sub>9</sub> | 3-hydroxy-2-[[[(9Z)-1-oxo-9-hexadecen-1-yl]oxy]propyl β-D-galactopyranoside | III                           |
| 71       | 14.20                | -                           | -                | -                                                               | 297.2433 [M-H] <sup>-</sup> | -0.869           | 279, 251, 207, 155      | 298.2508   | C <sub>18</sub> H <sub>34</sub> O <sub>3</sub> | 6,7-epoxystearic acid                                                       | III                           |
| 72       | 14.33                | 445.3159 [M+H] <sup>+</sup> | -0.068           | 409, 343, 285, 267, 187                                         | 443.3013 [M-H] <sup>-</sup> | -0.354           | -                       | 444.3087   | C <sub>24</sub> H <sub>44</sub> O <sub>7</sub> | 1-(9-octadecenoate)-β-D-glucopyranose                                       | III                           |
| 73       | 14.36                | 295.2267 [M+H] <sup>+</sup> | -0.241           | 255, 129, 101                                                   | -                           | -                | -                       | 294.2195   | C <sub>18</sub> H <sub>30</sub> O <sub>3</sub> | 9-oxo-octadecadienoic acid                                                  | III                           |
| 74       | 14.50                | -                           | -                | -                                                               | 503.3012 [M-H] <sup>-</sup> | -0.371           | 383, 361, 339, 299, 279 | 504.3087   | C <sub>29</sub> H <sub>44</sub> O <sub>7</sub> | 2,3-seco-2,3-dicarboxyplatanic acid                                         | III                           |
| 75       | 15.09                | 782.5689 [M+H] <sup>+</sup> | -0.346           | 727, 573, 555, 499, 363, 345, 335, 327, 317, 307, 299, 289, 271 | -                           | -                | -                       | 782.5697   | C <sub>48</sub> H <sub>78</sub> O <sub>8</sub> | 2,3-bis(4-hydroxy-3-methoxybenzyl)butane-1,4-diyl ditetradecanoate          | III                           |
| 76       | 15.46                | 427.3205 [M+H] <sup>+</sup> | -0.332           | 409, 301, 283, 261, 243                                         | 425.3063 [M-H] <sup>-</sup> | 0.222            | -                       | 426.3134   | C <sub>28</sub> H <sub>42</sub> O <sub>3</sub> | 9,11-dehydroergosterolp                                                     | III                           |

| Peak No. | Retention time (min) | Positive ESI mode                                           |                  |                                                       | Negative ESI mode |                  |                  | Exact mass | Formula                                                          | Identification                                   | Confidence level <sup>a</sup> |
|----------|----------------------|-------------------------------------------------------------|------------------|-------------------------------------------------------|-------------------|------------------|------------------|------------|------------------------------------------------------------------|--------------------------------------------------|-------------------------------|
|          |                      | Adduct ion m/z                                              | Mass error (ppm) | Fragment ion m/z                                      | Adduct ion m/z    | Mass error (ppm) | Fragment ion m/z |            |                                                                  |                                                  |                               |
| 77       | 15.47                | 274.2739 [M+H] <sup>+</sup>                                 | -0.714           | 256, 237, 84                                          | -                 | -                | -                | 273.2668   | C <sub>16</sub> H <sub>35</sub> O <sub>2</sub> N                 | eroxide<br>2-amino-1,3-hexadecanediol            | III                           |
| 78       | 15.59                | 483.2868 [M+H] <sup>+</sup>                                 | 0.671            | 465, 422, 406                                         | -                 | -                | -                | 482.2781   | C <sub>28</sub> H <sub>38</sub><br>O <sub>5</sub> N <sub>2</sub> | stachybotrin G                                   | III                           |
| 79       | 15.68                | 409.3100 [M+H] <sup>+</sup>                                 | -0.261           | 391, 283, 265, 243, 225                               | -                 | -                | -                | 408.3028   | C <sub>28</sub> H <sub>40</sub> O <sub>2</sub>                   | ganoderaside D                                   | III                           |
| 80       | 15.69                | 391.2994 [M+H] <sup>+</sup>                                 | -0.262           | 265, 225                                              | -                 | -                | -                | 390.2923   | C <sub>28</sub> H <sub>38</sub> O                                | ergosta-1,5,7,9(11),22-pentaen-3-one             | III                           |
| 81       | 15.83                | 591.3885 [M+H] <sup>+</sup><br>613.3708 [M+Na] <sup>+</sup> | -1.006<br>-0.391 | 411, 465, 425, 285, 245                               | -                 | -                | -                | 590.3819   | C <sub>34</sub> H <sub>54</sub> O <sub>8</sub>                   | 3-O-β-D-glucopyranosyl ergosterol peroxide       | III                           |
| 82       | 16.14                | 340.2846 [M+H] <sup>+</sup>                                 | -0.207           | 298, 280, 238, 112                                    | -                 | -                | -                | 339.2773   | C <sub>20</sub> H <sub>37</sub> O <sub>3</sub> N                 | 2-methyl-6-(11-oxododecyl)piperidin-3-yl acetate | III                           |
| 83       | 16.50                | 307.2631 [M+H] <sup>+</sup>                                 | -0.218           | 263                                                   | -                 | -                | -                | 306.2559   | C <sub>20</sub> H <sub>34</sub> O <sub>2</sub>                   | diroleuton                                       | III                           |
| 84       | 16.51                | 307.2631 [M+H] <sup>+</sup>                                 | -0.185           | 292, 261, 219, 191, 173, 149, 123, 109                | -                 | -                | -                | 306.2559   | C <sub>20</sub> H <sub>34</sub> O <sub>2</sub>                   | linolenic acid ethyl ester                       | III                           |
| 85       | 16.63                | 429.3362 [M+H] <sup>+</sup>                                 | -0.260           | 411, 393, 375, 303, 285, 267, 263, 249, 245, 227, 209 | -                 | -                | -                | 428.3290   | C <sub>28</sub> H <sub>44</sub> O <sub>3</sub>                   | (5α,6α)-epoxy-ergosta-8(14),22-diene-3β,7β-diol  | III                           |



| Peak No. | Retention time (min) | Positive ESI mode                                           |                  |                                                       | Negative ESI mode           |                  |                  | Exact mass | Formula                                          | Identification                                      | Confidence level <sup>a</sup> |
|----------|----------------------|-------------------------------------------------------------|------------------|-------------------------------------------------------|-----------------------------|------------------|------------------|------------|--------------------------------------------------|-----------------------------------------------------|-------------------------------|
|          |                      | Adduct ion m/z                                              | Mass error (ppm) | Fragment ion m/z                                      | Adduct ion m/z              | Mass error (ppm) | Fragment ion m/z |            |                                                  |                                                     |                               |
| 86       | 16.64                | 368.3160 [M+H] <sup>+</sup>                                 | 0.243            | 326, 308, 266, 112                                    | 366.3012 [M-H] <sup>-</sup> | -0.348           | -                | 367.3086   | C <sub>22</sub> H <sub>41</sub> O <sub>3</sub> N | 2-methyl-6-(13-oxotetradecyl)piperidin-3-yl acetate | III                           |
| 87       | 16.67                | 326.3053 [M+H] <sup>+</sup>                                 | -0.171           | 309, 121                                              | -                           | -                | -                | 325.2981   | C <sub>20</sub> H <sub>39</sub> O <sub>2</sub> N | oleoylethanolamide                                  | III                           |
| 88       | 16.85                | 380.3159 [M+H] <sup>+</sup>                                 | -0.159           | 350, 322, 267, 239                                    | 378.3013 [M-H] <sup>-</sup> | -0.178           | -                | 379.3086   | C <sub>23</sub> H <sub>41</sub> O <sub>3</sub> N | hurghamide D                                        | III                           |
| 89       | 16.90                | 445.3315 [M+H] <sup>+</sup>                                 | 0.480            | 427, 409, 391, 319, 301, 283, 279, 261, 265, 243, 225 | -                           | -                | -                | 444.3240   | C <sub>28</sub> H <sub>44</sub> O <sub>4</sub>   | 3β,5α,9α-trihydroxyergosta-7,22-dien-6-one          | III                           |
| 90       | 16.99                | 393.3150 [M+H] <sup>+</sup>                                 | -0.489           | 267, 227                                              | -                           | -                | -                | 392.3079   | C <sub>28</sub> H <sub>40</sub> O                | ergone                                              | III                           |
| 91       | 17.02                | 318.3002 [M+H] <sup>+</sup>                                 | -0.222           | 300, 282, 100                                         | -                           | -                | -                | 317.2930   | C <sub>18</sub> H <sub>39</sub> O <sub>3</sub> N | 2-amino-1,3,4-octadecanetriol                       | III                           |
| 92       | 17.03                | -                                                           | -                | -                                                     | 339.2327 [M-H] <sup>-</sup> | -0.747           | 163              | 340.2402   | C <sub>23</sub> H <sub>32</sub> O <sub>2</sub>   | 2,2'-methylenebis(4-methyl-6-tert-butylphenol)      | III                           |
| 93       | 17.56                | -                                                           | -                | -                                                     | 279.2326 [M-H] <sup>-</sup> | -1.266           | 261              | 280.2402   | C <sub>18</sub> H <sub>32</sub> O <sub>2</sub>   | linoleic acid                                       | III                           |
| 94       | 17.92                | 282.2790 [M+H] <sup>+</sup>                                 | 0.501            | 265, 247, 191, 177, 163, 135, 121, 111                | 280.2650 [M-H] <sup>-</sup> | 0.462            | -                | 281.2719   | C <sub>18</sub> H <sub>35</sub> NO               | oleamide                                            | III                           |
| 95       | 18.05                | 411.3255 [M+H] <sup>+</sup>                                 | -0.698           | 393, 285, 253, 245, 213,                              | 409.3112 [M-H] <sup>-</sup> | 0.016            | -                | 410.3185   | C <sub>28</sub> H <sub>42</sub> O <sub>2</sub>   | 3-hydroxyergosta-5,8,22-trien-7-one                 | III                           |
| 96       | 18.24                | 429.3363 [M+H] <sup>+</sup><br>451.3179 [M+Na] <sup>+</sup> | 0.019<br>-0.745  | 411, 393, 375, 303, 287, 285,                         | -                           | -                | -                | 428.3290   | C <sub>28</sub> H <sub>44</sub> O <sub>3</sub>   | ergosterol peroxide                                 | III                           |

| Peak No. | Retention time (min) | Positive ESI mode           |                  |                                   | Negative ESI mode           |                  |                    | Exact mass | Formula                                           | Identification                           | Confidence level <sup>a</sup> |
|----------|----------------------|-----------------------------|------------------|-----------------------------------|-----------------------------|------------------|--------------------|------------|---------------------------------------------------|------------------------------------------|-------------------------------|
|          |                      | Adduct ion m/z              | Mass error (ppm) | Fragment ion m/z                  | Adduct ion m/z              | Mass error (ppm) | Fragment ion m/z   |            |                                                   |                                          |                               |
|          |                      |                             |                  | 269, 263, 249, 245, 209           |                             |                  |                    |            |                                                   |                                          |                               |
| 97       | 18.37                | 256.2635 [M+H] <sup>+</sup> | 0.043            | 241, 213                          | -                           | -                | -                  | 255.2562   | C <sub>16</sub> H <sub>33</sub> ON                | hexadecanamide                           | III                           |
| 98       | 18.48                | 397.3463 [M+H] <sup>+</sup> | -0.610           | 379, 271, 253, 231, 213           | 369.3393 [M+H] <sup>-</sup> | -0.474           | -                  | 396.3392   | C <sub>28</sub> H <sub>44</sub> O                 | ergosterol (4)                           | I                             |
| 99       | 18.58                | 384.3259 [M+H] <sup>+</sup> | -0.420           | 366, 261, 257                     | 382.3114 [M-H] <sup>-</sup> | -0.523           | -                  | 383.3188   | C <sub>26</sub> H <sub>41</sub> ON                | veracintine                              | III                           |
| 100      | 19.04                | 409.3099 [M+H] <sup>+</sup> | -0.555           | 283, 243                          | 407.2952 [M-H] <sup>-</sup> | -0.354           | -                  | 408.3028   | C <sub>28</sub> H <sub>40</sub> O <sub>2</sub>    | ergosta-5,8,22-triene-3,11-dione         | III                           |
| 101      | 19.52                | 312.3259 [M+H] <sup>+</sup> | -0.517           | 265                               | -                           | -                | -                  | 311.3188   | C <sub>20</sub> H <sub>41</sub> ON                | 2-nonadecanone-O-methyloxime             | III                           |
| 102      | 19.67                | 386.3416 [M+H] <sup>+</sup> | -0.496           | 370, 274, 258                     | -                           | -                | -                  | 385.3345   | C <sub>26</sub> H <sub>43</sub> ON                | 4-azacholest-5-en-3-one                  | III                           |
| 103      | 19.69                | 360.3260 [M+H] <sup>+</sup> | -0.282           | 344, 213, 134                     | 358.3116 [M-H] <sup>-</sup> | 0.279            | -                  | 359.3188   | C <sub>24</sub> H <sub>41</sub> ON                | N-(2-phenylethyl)hexadecanamide          | III                           |
| 104      | 20.47                | 284.2946 [M+H] <sup>+</sup> | -0.673           | 268, 241                          | -                           | -                | -                  | 283.2875   | C <sub>18</sub> H <sub>37</sub> ON                | stearamide                               | III                           |
| 105      | 21.45                | 710.5559 [M+H] <sup>+</sup> | -0.893           | 532, 484, 338, 294, 276           | -                           | -                | -                  | 709.5493   | C <sub>41</sub> H <sub>75</sub> O <sub>8</sub> N  | thraustochytroside A                     | III                           |
| 106      | 21.54                | -                           | -                | -                                 | 772.5578 [M-H] <sup>-</sup> | -0.305           | 564, 546, 420, 292 | 773.5653   | C <sub>42</sub> H <sub>79</sub> O <sub>11</sub> N | rhizoleucinoside                         | III                           |
| 107      | 21.92                | 338.3417 [M+H] <sup>+</sup> | -1.182           | 321, 303, 247, 163, 149, 135, 111 | -                           | -                | -                  | 337.3345   | C <sub>22</sub> H <sub>43</sub> ON                | erucamide                                | III                           |
| 108      | 21.96                | 579.4978 [M+H] <sup>+</sup> | -0.866           | -                                 | 577.4836 [M-H] <sup>-</sup> | -0.292           | 377, 313, 295, 281 | 578.4910   | C <sub>36</sub> H <sub>66</sub> O <sub>5</sub>    | 1-(hydroxymethyl)-2[(1-oxohexadecyl)oxy] | III                           |

| Peak No. | Retention time (min) | Positive ESI mode           |                  |                  | Negative ESI mode           |                  |                  | Exact mass        | Formula                                        | Identification                                                                                      | Confidence level <sup>a</sup> |
|----------|----------------------|-----------------------------|------------------|------------------|-----------------------------|------------------|------------------|-------------------|------------------------------------------------|-----------------------------------------------------------------------------------------------------|-------------------------------|
|          |                      | Adduct ion m/z              | Mass error (ppm) | Fragment ion m/z | Adduct ion m/z              | Mass error (ppm) | Fragment ion m/z |                   |                                                |                                                                                                     |                               |
| 109      | 24.22                | 241.2161 [M+H] <sup>+</sup> | -0.401           | -                | 239.2017 [M-H] <sup>-</sup> | 0.111            | 221, 203         | 240.2089          | C <sub>15</sub> H <sub>28</sub> O <sub>2</sub> | ethyl-ester-9,12-heptadecadienoic acid                                                              | III                           |
| 110      | 24.84                | 241.2160 [M+H] <sup>+</sup> | -0.650           | -                | 239.2017 [M-H] <sup>-</sup> | 0.111            | 221, 203         | 240.2089<br>3.633 | C <sub>15</sub> H <sub>28</sub> O <sub>2</sub> | 3-(10-hydroxy-10-methylethyl)-5,8a-dimethyldecahydroazulen-4-ol<br>(5β, 6α)-6,11-dihydroxyeudesmane | III                           |

<sup>a</sup>) The confidence level of identity of all the identified components were determined following the four levels defined by the Metabolomics Standards Initiative. Level I : confidently identified compounds; Level II : Putatively annotated compounds; Level III: putatively annotated compound classes; Level IV: unknown compounds.

<sup>b</sup>) The bracketed bold figures showed the serial number of reference compounds.

**Table S2.** The virtual screening results for self-built 3D chemical database including 110 compounds in *S. crista* with four kinds of SFKs (Hck, Lyn, Fyn and Syk) as the receptors.

**(a) Hck**

| #  | Compound name                                                                               | Total score <sup>a</sup> | Crash | Polar | Similarity | D score | PMF score | G score | Chem score | C score |
|----|---------------------------------------------------------------------------------------------|--------------------------|-------|-------|------------|---------|-----------|---------|------------|---------|
| 01 | 10-hydroxy-8,12-octadecadienoic acid                                                        | 11.08                    | -0.92 | 4.70  | 0.46       | -144.69 | -16.55    | -248.00 | -25.14     | 4       |
| 02 | salternamide D                                                                              | 10.94                    | -3.49 | 4.73  | 0.57       | -187.83 | -22.93    | -365.29 | -29.51     | 4       |
| 03 | hurghamide D                                                                                | 10.30                    | -3.05 | 1.44  | 0.43       | -164.76 | 4.96      | -286.54 | -24.63     | 4       |
| 04 | 2-amino-1,3-hexadecanediol                                                                  | 10.09                    | -2.01 | 4.46  | 0.38       | -89.72  | -16.98    | -201.38 | -26.19     | 5       |
| 05 | 2-methyl-6-(13-oxotetradecyl)piperidin-3-yl acetate                                         | 9.64                     | -1.68 | 0.90  | 0.47       | -179.22 | 6.61      | -355.41 | -28.75     | 4       |
| 06 | oleoyl ethanolamide                                                                         | 9.52                     | -2.05 | 1.89  | 0.37       | -147.84 | 6.84      | -257.37 | -26.11     | 4       |
| 07 | 9-hydroxy-10,14-octadecadien-12-ynoic acid                                                  | 9.13                     | -2.61 | 2.25  | 0.37       | -152.93 | -1.75     | -243.76 | -23.85     | 5       |
| 08 | 2,2'-methylenebis(4-methyl-6-tert butylphenol)                                              | 6.97                     | -1.73 | 0.93  | 0.27       | 8.91    | -21.25    | -272.47 | -27.14     | 5       |
| 09 | 3-cyclohexene-1-butyraldehyde-3-hydroxy- $\alpha$ -isopropyl-1-methyl-2-oxo-disemicarbazone | 6.84                     | -1.29 | 4.93  | 0.50       | -236.90 | -19.59    | -428.79 | -39.95     | 4       |
| 10 | antrodin D                                                                                  | 6.32                     | -3.63 | 0.40  | 0.55       | -83.14  | -18.19    | -158.84 | -4.05      | 4       |
| 11 | 5 $\alpha$ ,6 $\alpha$ -epoxy-(22E,24R)-ergosta-8(14),22-diene-3 $\beta$ ,7 $\beta$ -diol   | 6.27                     | -3.72 | 1.41  | 0.43       | -147.91 | -19.09    | -319.39 | -29.15     | 4       |
| -  | RK20449 <sup>b</sup>                                                                        | 10.24                    | -1.14 | 2.11  | 0.71       | -166.45 | -81.46    | -326.43 | -34.69     | 5       |

**(b) Lyn**

| #  | Compound name                                                      | Total score <sup>a</sup> | Crash | Polar | Similarity | D score | PMF score | G score | Chem score | C score |
|----|--------------------------------------------------------------------|--------------------------|-------|-------|------------|---------|-----------|---------|------------|---------|
| 01 | thraustochytrioside A                                              | 11.60                    | -5.30 | 2.07  | 0.44       | -121.35 | -16.73    | -219.41 | -21.40     | 4       |
| 02 | 2,3-bis(4-hydroxy-3-methoxybenzyl)butane-1,4-diyl ditetradecanoate | 10.33                    | -3.57 | 1.06  | 0.41       | -214.55 | 3.26      | -372.06 | -31.81     | 5       |
| 03 | 9-hydroxy-10,14-octadecadien-12-ynoic acid                         | 9.72                     | -1.38 | 4.15  | 0.49       | -139.90 | 3.70      | -241.73 | -23.60     | 4       |
| 04 | 1-(9-octadecenoate)- $\beta$ -D-glucopyranose                      | 9.43                     | -2.09 | 2.83  | 0.33       | -154.63 | -24.90    | -308.10 | -18.42     | 4       |
| 05 | hurghamide D                                                       | 9.30                     | -2.31 | 2.43  | 0.39       | -133.97 | -16.45    | -234.93 | -22.61     | 4       |
| 06 | linolenic acid ethyl ester                                         | 9.25                     | -1.92 | 1.30  | 0.43       | -60.32  | -8.09     | -150.06 | -15.60     | 4       |
| 07 | linoleic acid                                                      | 8.41                     | -1.42 | 2.33  | 0.50       | 27.62   | -20.11    | -122.50 | -17.89     | 5       |

| #  | Compound name                                                                             | Total score <sup>a</sup> | Crash | Polar | Similarity | D score | PMF score | G score | Chem score | C score |
|----|-------------------------------------------------------------------------------------------|--------------------------|-------|-------|------------|---------|-----------|---------|------------|---------|
| 08 | salternamide D                                                                            | 8.24                     | -3.23 | 3.20  | 0.50       | -161.63 | -8.95     | -272.14 | -25.91     | 4       |
| 09 | 2-amino-1,3-hexadecanediol                                                                | 8.22                     | -1.46 | 3.61  | 0.36       | -94.74  | -2.21     | -220.80 | -22.10     | 4       |
| 10 | 10-hydroxy-8,12-octadecadienoic acid                                                      | 8.13                     | -1.30 | 3.27  | 0.58       | -118.04 | -5.55     | -194.34 | -19.87     | 5       |
| 11 | 2-amino-1,3,4-tetradecanetriol                                                            | 7.90                     | -3.52 | 3.53  | 0.36       | -132.73 | -23.56    | -223.69 | -24.70     | 4       |
| 12 | antrodin C                                                                                | 7.88                     | -1.92 | 2.01  | 0.30       | -141.58 | -4.70     | -221.72 | -23.68     | 4       |
| 13 | sparoside A                                                                               | 7.68                     | -1.46 | 4.33  | 0.38       | -130.97 | -35.04    | -202.86 | -18.07     | 4       |
| 14 | xanthoangelol                                                                             | 7.62                     | -3.37 | 1.97  | 0.49       | -120.57 | -7.98     | -244.68 | -27.34     | 4       |
| 15 | antrodin D                                                                                | 7.59                     | -1.92 | 2.22  | 0.55       | -74.60  | -26.50    | -139.27 | -5.14      | 5       |
| 16 | 2-methyl-6-(13-oxotetradecyl)piperidin-3-yl acetate                                       | 7.55                     | -1.37 | 2.35  | 0.37       | -151.12 | -20.66    | -281.24 | -31.35     | 5       |
| 17 | oleoyl ethanolamide                                                                       | 7.32                     | -1.39 | 2.75  | 0.34       | -122.63 | -27.37    | -248.86 | -26.24     | 4       |
| 18 | 9,11-dehydroergosterolperoxide                                                            | 7.23                     | -1.52 | 1.16  | 0.36       | -123.84 | -8.61     | -242.93 | -26.40     | 4       |
| 19 | 5 $\alpha$ ,6 $\alpha$ -epoxy-(22E,24R)-ergosta-8(14),22-diene-3 $\beta$ ,7 $\beta$ -diol | 6.68                     | -1.68 | 1.41  | 0.42       | -126.19 | -19.66    | -265.73 | -26.21     | 4       |
| 20 | stachybotrin G                                                                            | 6.44                     | -3.23 | 2.06  | 0.50       | -148.19 | -22.74    | -278.49 | -26.62     | 4       |
| 21 | ergosta-5,8,22-triene-3,11-dione                                                          | 6.39                     | -2.29 | 0.35  | 0.39       | -117.45 | 14.99     | -254.63 | -27.96     | 5       |
| -  | INNO-406 <sup>b</sup>                                                                     | 8.52                     | -1.59 | 1.63  | 0.51       | -150.29 | -51.63    | -252.22 | -34.28     | 5       |

(c) Fyn

| #  | Compound name                              | Total score <sup>a</sup> | Crash | Polar | Similarity | D score | PMF score | G score | Chem score | C score |
|----|--------------------------------------------|--------------------------|-------|-------|------------|---------|-----------|---------|------------|---------|
| 01 | thraustochytrioside A                      | 11.28                    | -2.63 | 3.94  | 0.41       | -140.27 | -12.99    | -259.44 | -27.95     | 4       |
| 02 | 10-hydroxy-8,12-octadecadienoic acid       | 9.62                     | -0.95 | 3.27  | 0.55       | -142.00 | -12.25    | -229.15 | -23.84     | 5       |
| 03 | antrodin D                                 | 8.61                     | -1.29 | 3.31  | 0.48       | -71.56  | -8.88     | -91.25  | -6.26      | 4       |
| 04 | 9-hydroxy-10,14-octadecadien-12-ynoic acid | 8.54                     | -1.78 | 3.82  | 0.44       | -143.64 | -1.68     | -241.54 | -24.25     | 5       |
| 05 | nicandrose E                               | 8.52                     | -3.94 | 3.49  | 0.43       | -80.82  | -22.60    | -125.52 | -15.27     | 4       |
| 06 | 2-amino-1,3,4-tetradecanetriol             | 8.28                     | -1.74 | 2.91  | 0.33       | -112.15 | -9.15     | -181.69 | -16.81     | 4       |
| 07 | linoleic acid                              | 7.91                     | -4.05 | 1.25  | 0.29       | 15.56   | -25.14    | -117.63 | -17.52     | 4       |
| 08 | oleoyl ethanolamide                        | 7.88                     | -1.46 | 2.18  | 0.39       | -125.02 | -12.83    | -218.70 | -19.90     | 4       |
| 09 | sparalide A                                | 7.51                     | -1.96 | 4.01  | 0.26       | -87.78  | -31.03    | -227.42 | -21.39     | 5       |

| #  | Compound name                                                                               | Total score <sup>a</sup> | Crash | Polar | Similarity | D score | PMF score | G score | Chem score | C score |
|----|---------------------------------------------------------------------------------------------|--------------------------|-------|-------|------------|---------|-----------|---------|------------|---------|
| 10 | 3-cyclohexene-1-butylaldehyde-3-hydroxy- $\alpha$ -isopropyl-1-methyl-2-oxo-disemicarbazone | 6.42                     | -0.77 | 3.84  | 0.64       | -191.24 | -17.80    | -331.39 | -30.35     | 4       |
| -  | AZD0530 <sup>b</sup>                                                                        | 6.56                     | -1.91 | 1.61  | 0.53       | -269.05 | -9.08     | -257.50 | -23.27     | 5       |

**(d) Syk**

| #  | Compound name                                                                               | Total score <sup>a</sup> | Crash | Polar | Similarity | D score  | PMF score | G score | Chem score | C score |
|----|---------------------------------------------------------------------------------------------|--------------------------|-------|-------|------------|----------|-----------|---------|------------|---------|
| 01 | 10-hydroxy-8,12-octadecadienoic acid                                                        | 8.73                     | -1.52 | 2.64  | 0.50       | -133.84  | -7.64     | -235.06 | -23.09     | 4       |
| 02 | rhizoleucinoside                                                                            | 8.49                     | -6.29 | 4.23  | 0.40       | -125.91  | -17.80    | -223.20 | -24.29     | 5       |
| 03 | hurghamide D                                                                                | 8.45                     | -2.01 | 0.96  | 0.50       | -135.88  | -28.62    | -217.54 | -22.80     | 5       |
| 04 | 3-cyclohexene-1-butylaldehyde-3-hydroxy- $\alpha$ -isopropyl-1-methyl-2-oxo-disemicarbazone | 8.19                     | -0.86 | 4.67  | 0.54       | -215.83  | -66.85    | -357.98 | -36.63     | 4       |
| 05 | 9-hydroxy-10,14-octadecadien-12-ynoic acid                                                  | 7.91                     | -0.90 | 3.99  | 0.54       | -101.02  | -1.03     | -161.06 | -17.98     | 4       |
| 06 | 2-amino-1,3-hexadecanediol                                                                  | 7.13                     | -1.57 | 3.32  | 0.40       | -111.23  | -35.13    | -238.07 | -23.52     | 4       |
| -  | RO9021 <sup>b</sup>                                                                         | 6.32                     | -1.09 | 2.72  | 0.39       | 24559.12 | -65.91    | -213.14 | -24.42     | 3       |

<sup>a</sup>) With the natural ligand of each protein as references, the RMSD was less than 2.0 for each match.

<sup>b</sup>) These compounds were known SFKs inhibitors, which were used as positive controls.

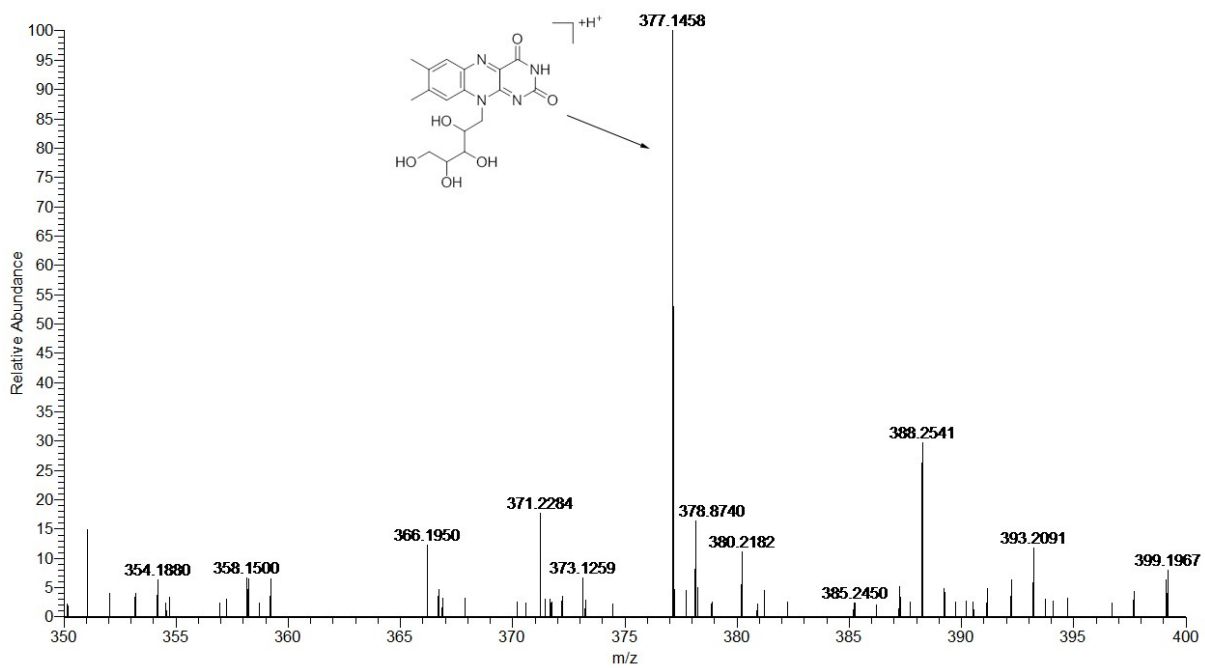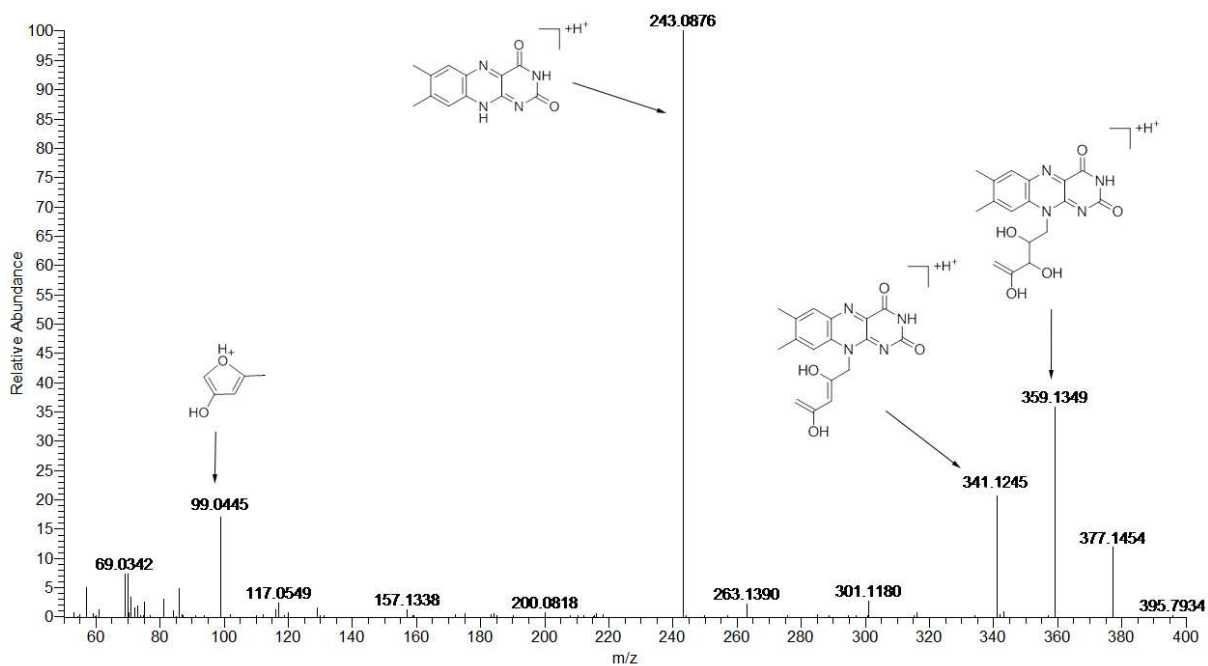

**Figure S1.** MS spectra and proposed fragment ions of riboflavin (**1**) in positive ion mode: (a) MS spectrum; (b) MS/MS spectrum (precursor ion was m/z 377).

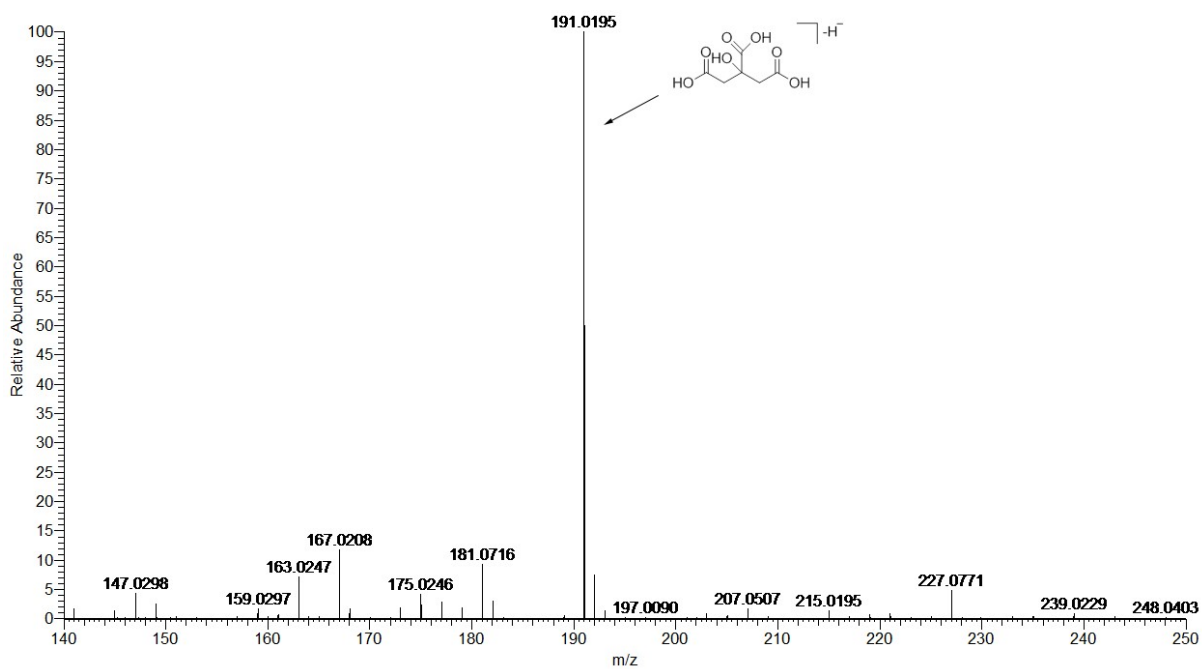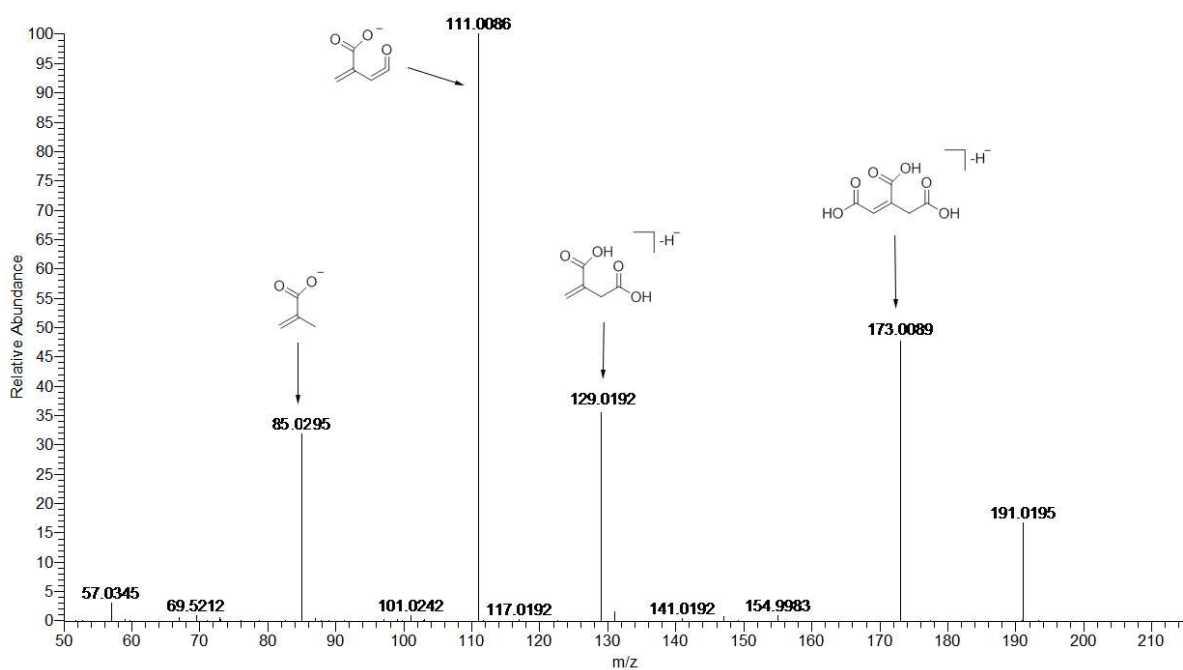

**Figure S2.** MS spectra and proposed fragment ions of citric acid (**2**) in negative ion mode: (a) MS spectrum; (b) MS/MS spectrum (precursor ion was  $m/z$  191).



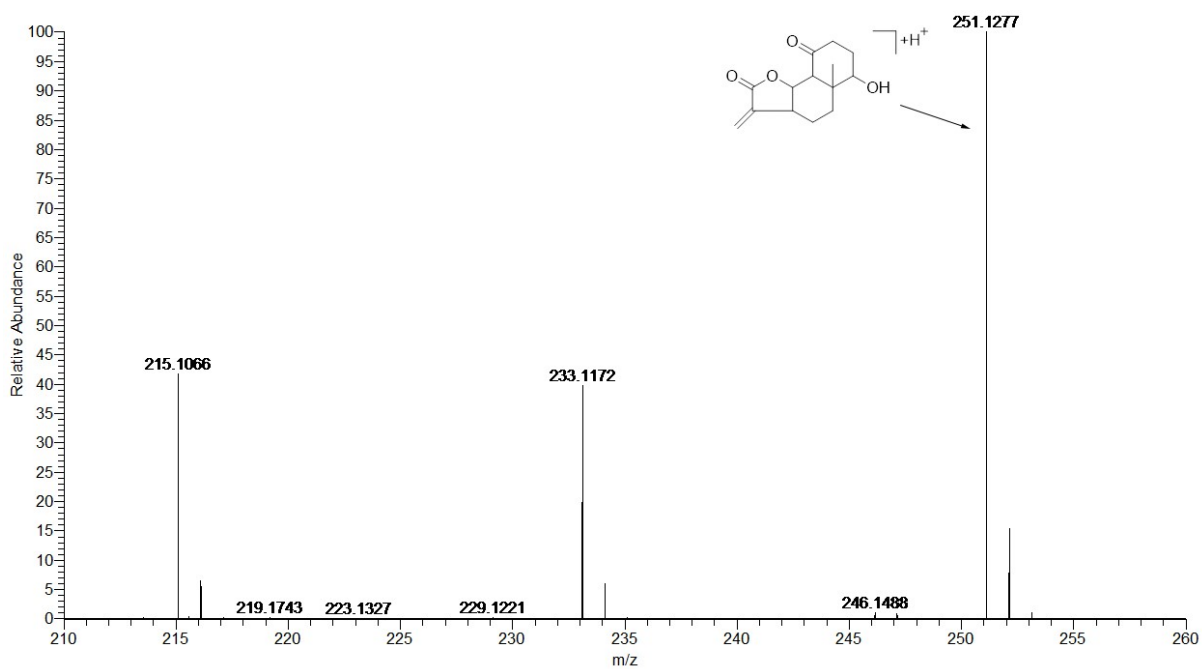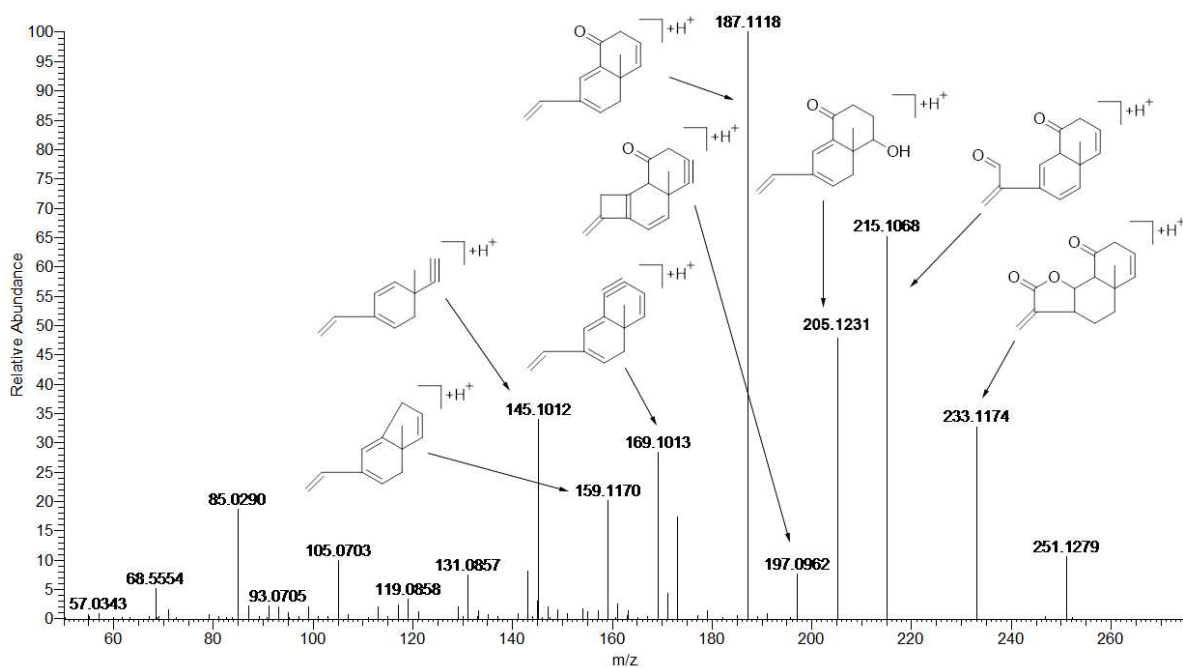

**Figure S3.** MS spectra and proposed fragment ions of ainsliatone A (**3**) in positive ion mode:  
 (a) MS spectrum; (b) MS/MS spectrum (precursor ion was m/z 251).

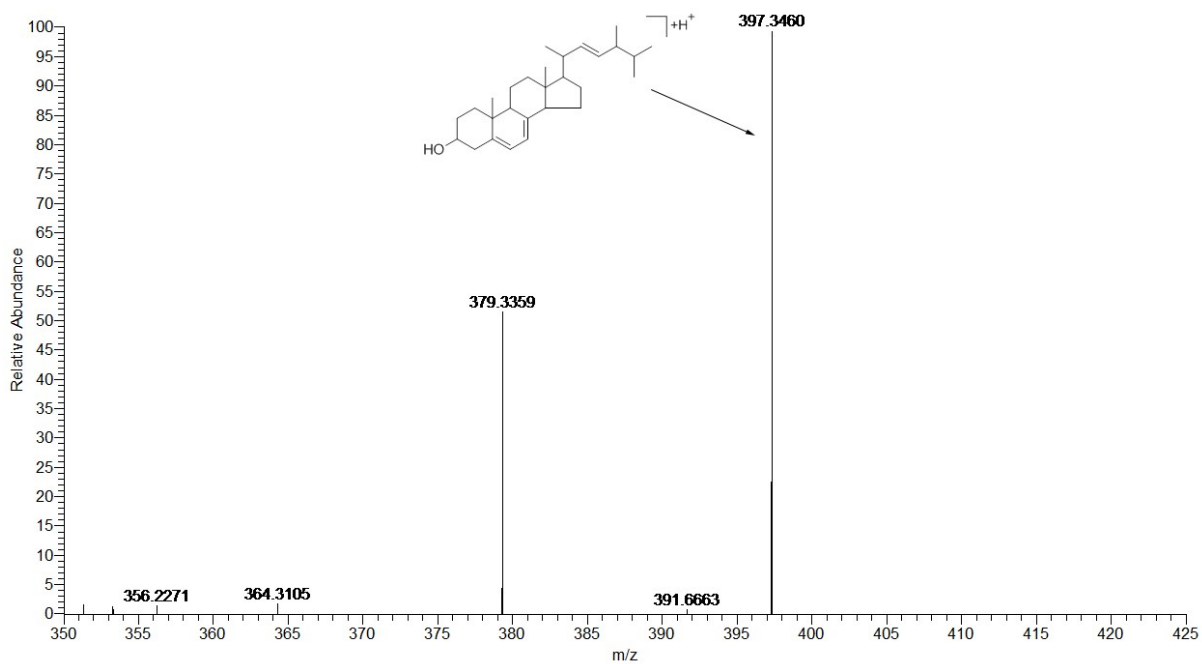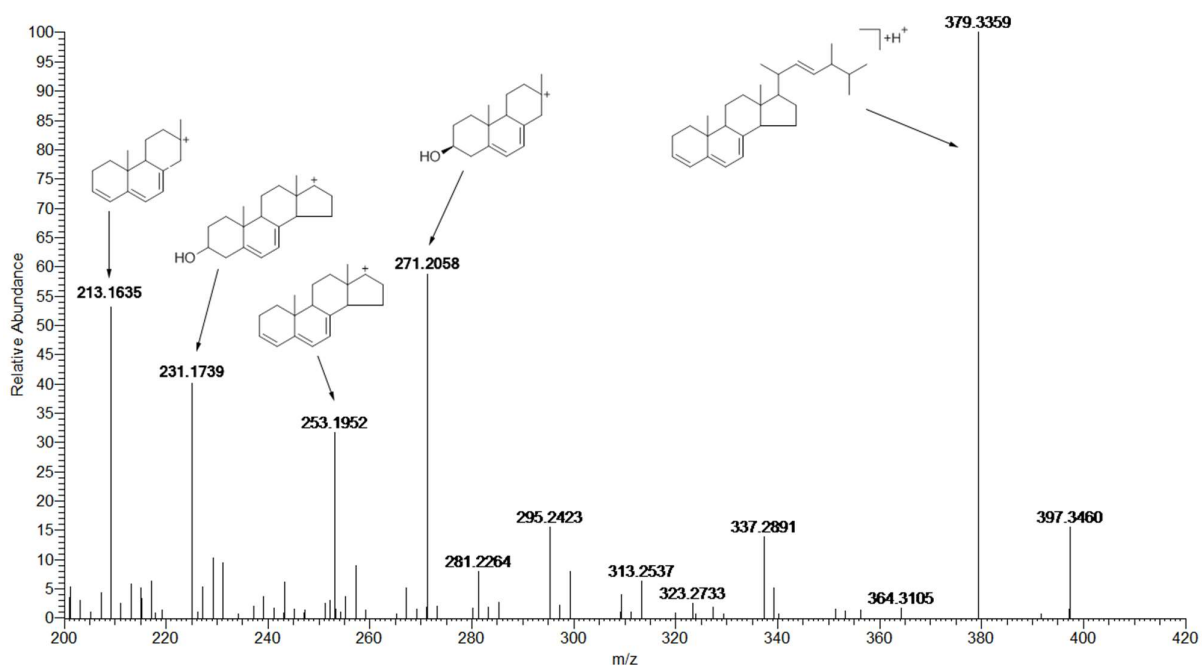

**Figure S4.** MS spectra and proposed fragment ions of ergosterol (**4**) in positive ion mode: (a) MS spectrum; (b) MS/MS spectrum (precursor ion was m/z 397).

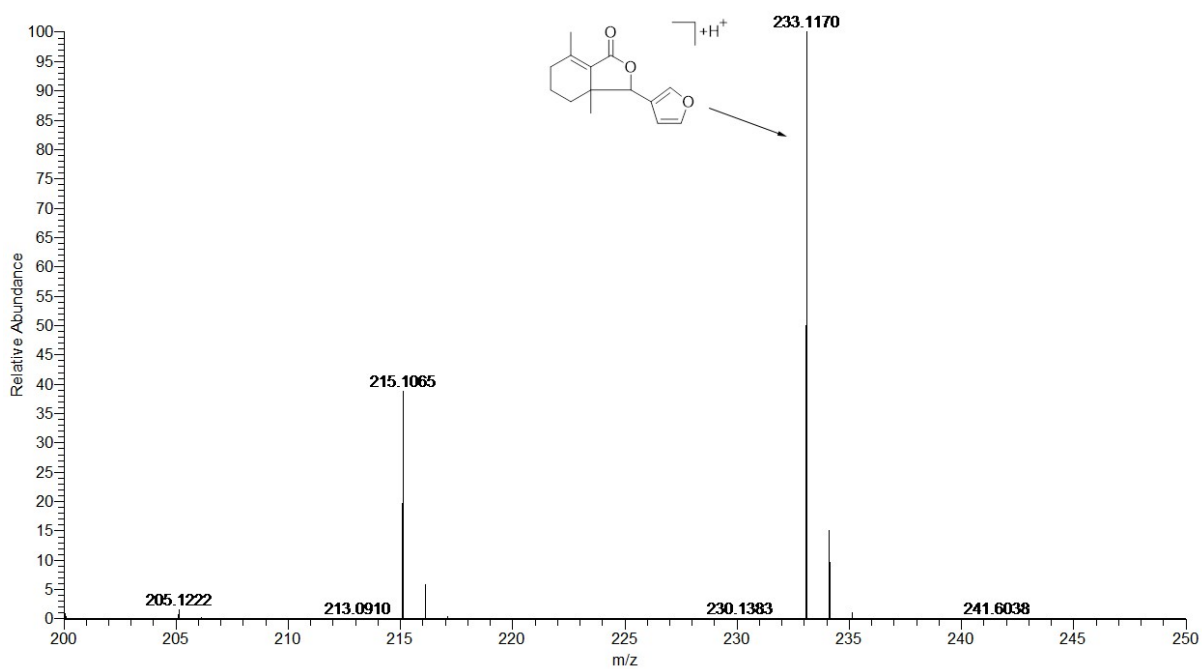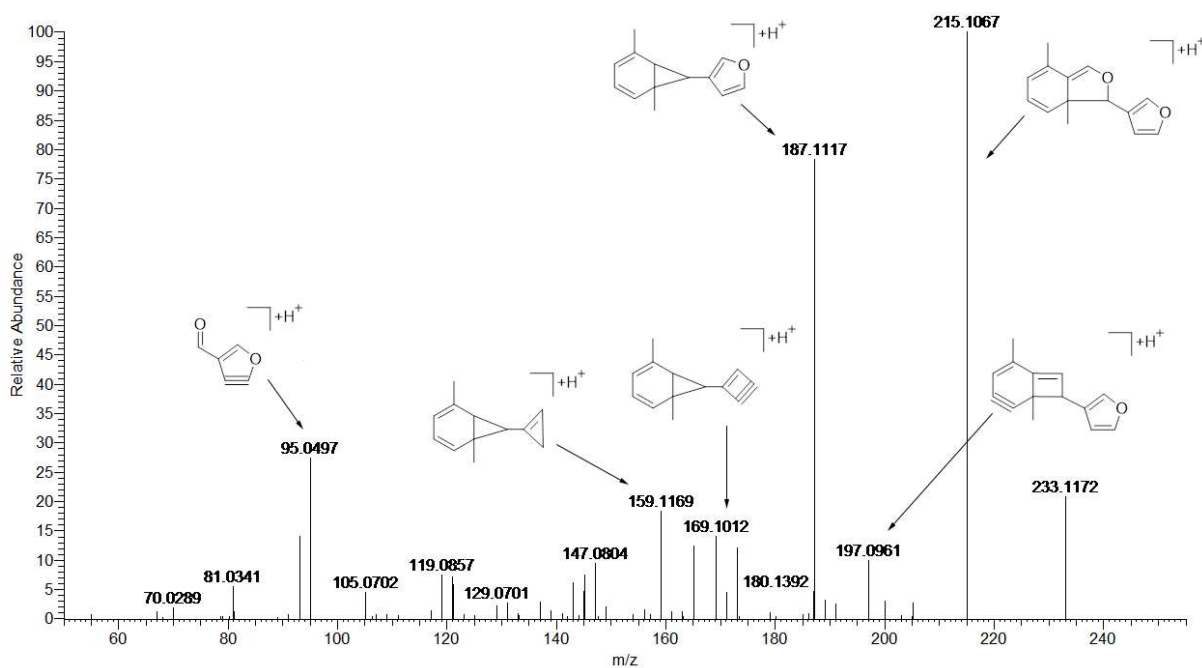

**Figure S5.** MS spectra and proposed fragment ions of fraxinellone (**5**) in positive ion mode:  
 (a) MS spectrum; (b) MS/MS spectrum (precursor ion was m/z 233).

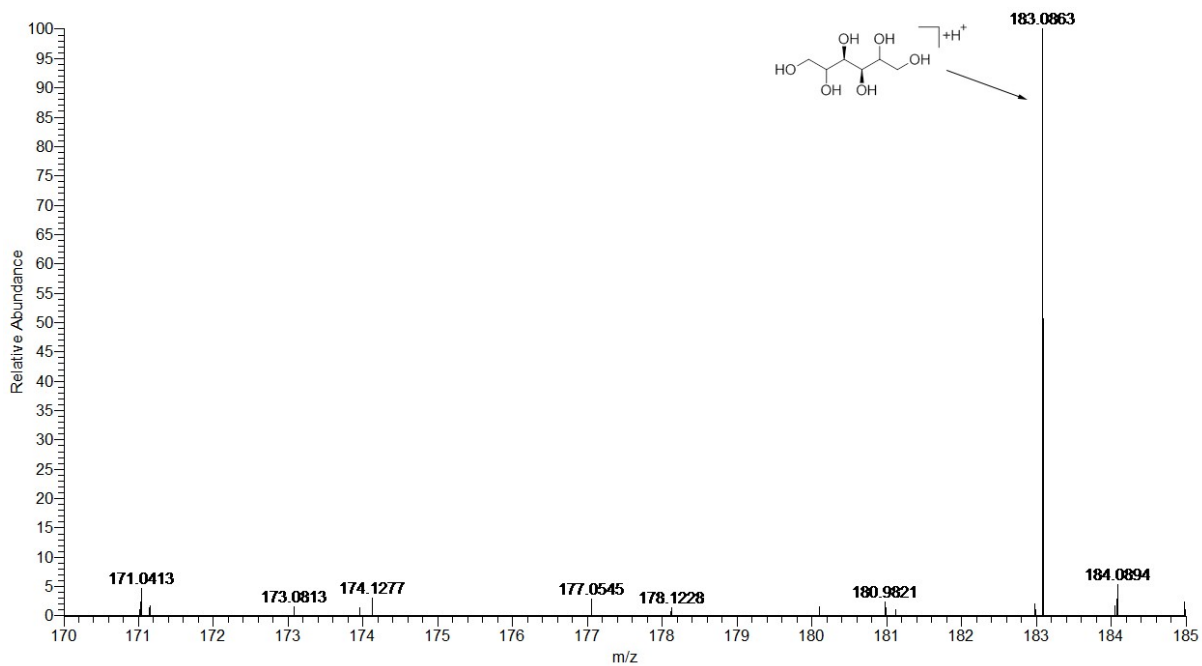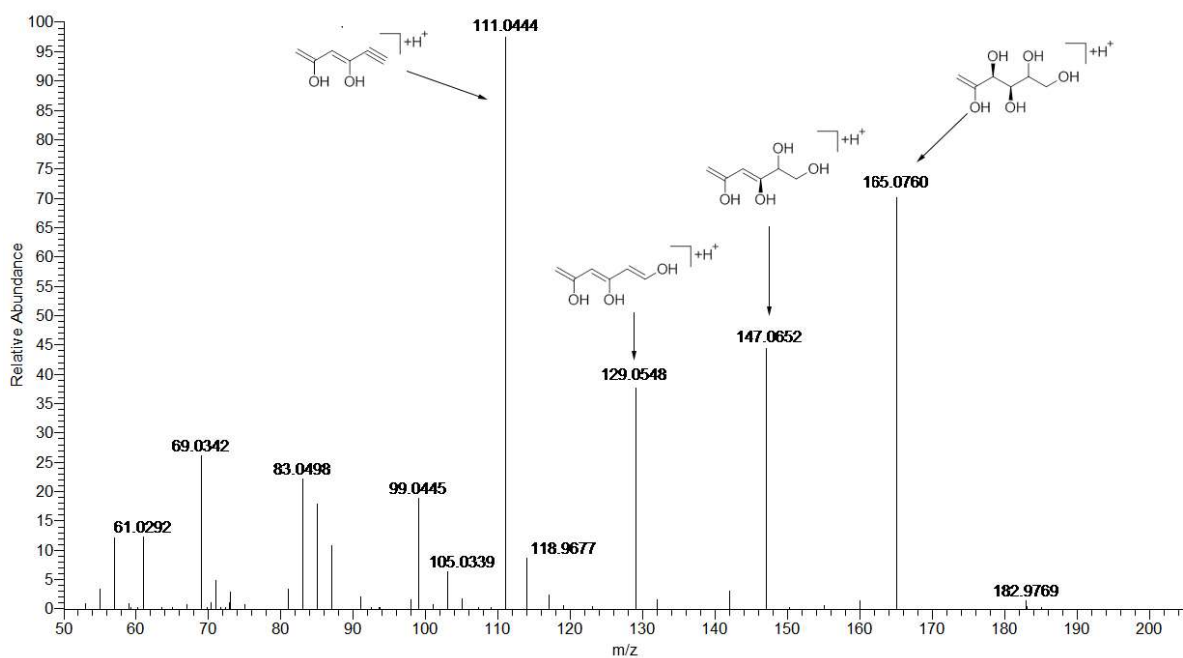

**Figure S6.** MS spectra and proposed fragment ions of mannitol (6) in positive ion mode: (a) MS spectrum; (b) MS/MS spectrum (precursor ion was  $m/z$  183)

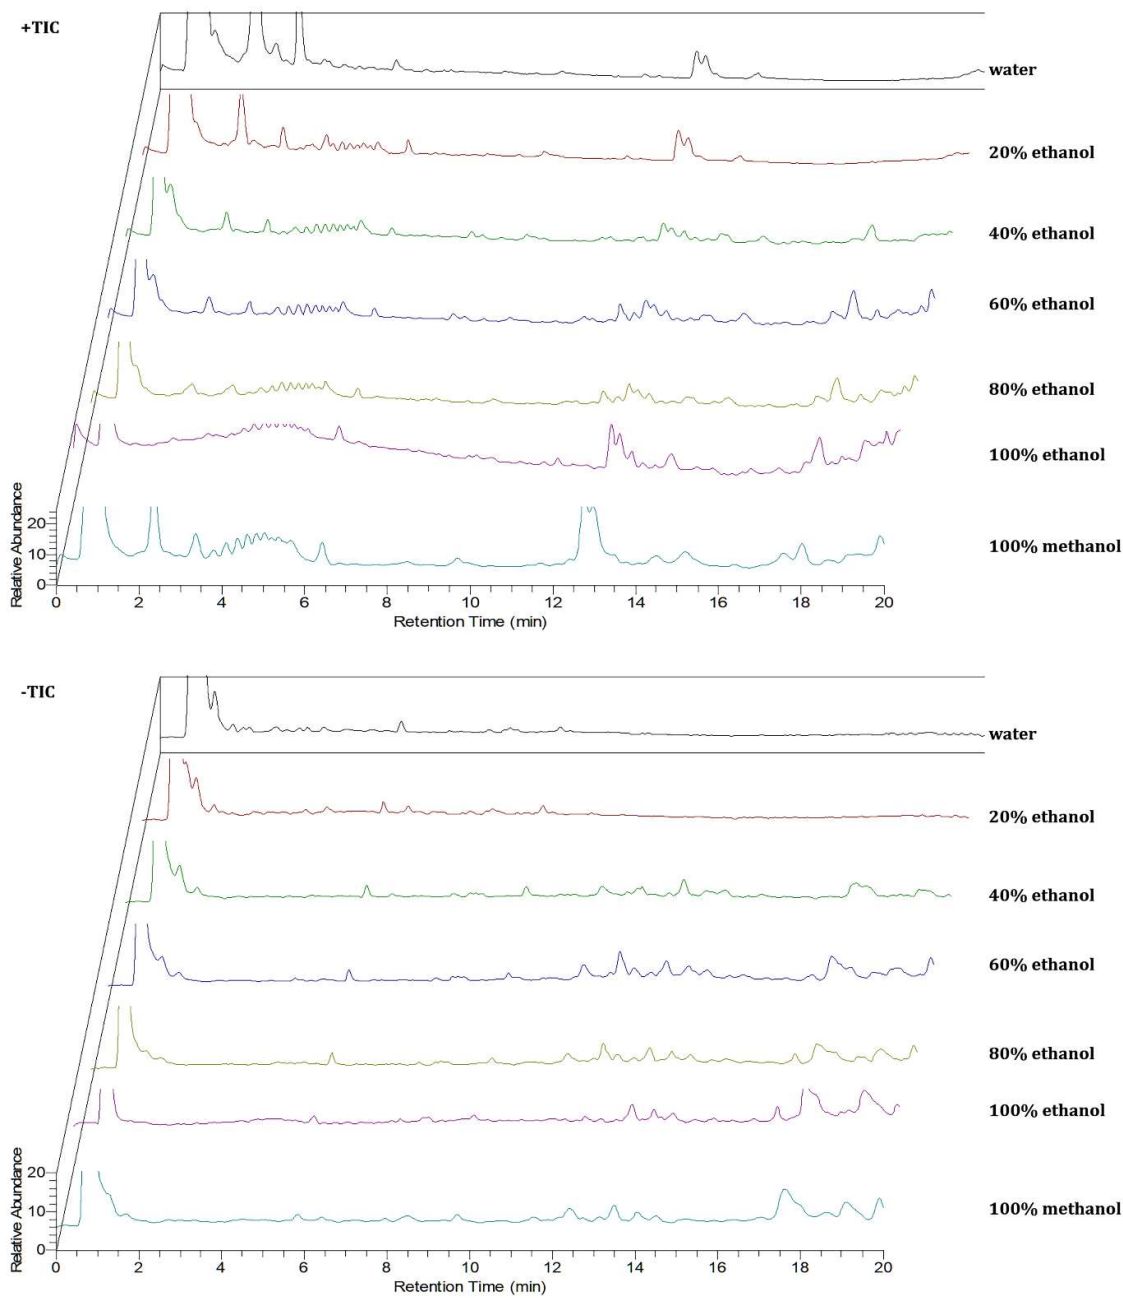

**Figure S7.** Comparison of total ion current chromatograms (TIC) of *S. crispa* extracted with different solvents in positive (above) and negative (below) ion modes (The mobile phase was composed of 0.1% formic acid aqueous solution (A) and acetonitrile (B), and the gradient elution program was 5–100% B at 0–20 min)

## citricacidmonomethylester

S. crista Extracts\_Neg #530 RT: 1.38 AV: 1 NL: 7.81E7  
F: FTMS - c ESI d Full ms2 205.0351@hcd30.00 [50.0000-225.0000]

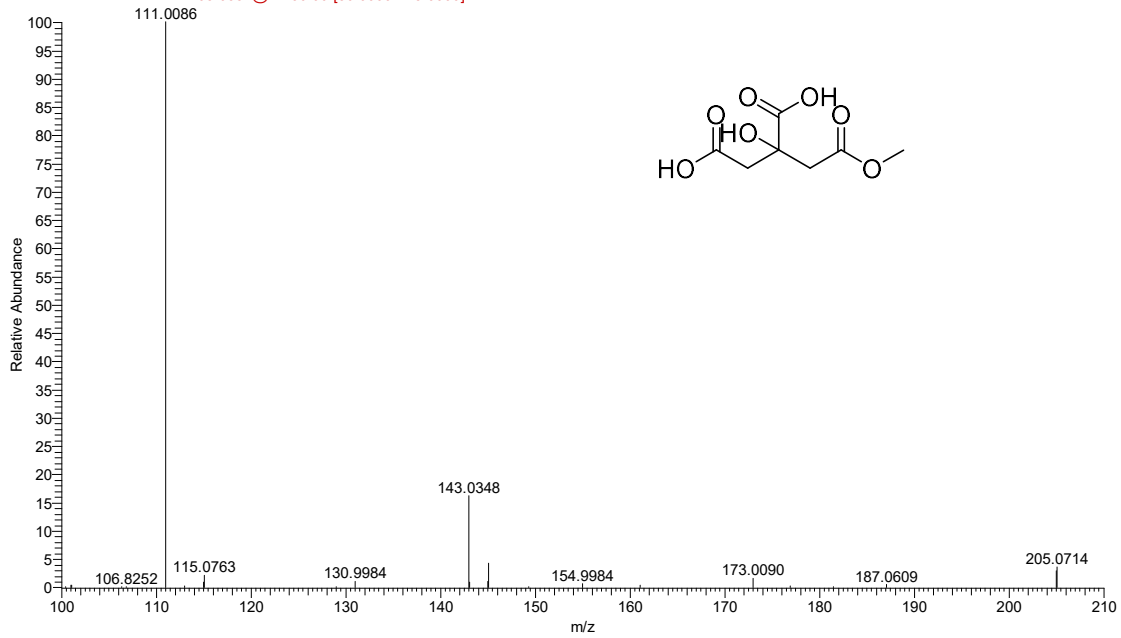

## methylsuccinicacid

S. crista Extracts\_Neg #618 RT: 1.61 AV: 1 NL: 1.10E6  
F: FTMS - c ESI d Full ms2 131.0362@hcd30.00 [50.0000-150.0000]

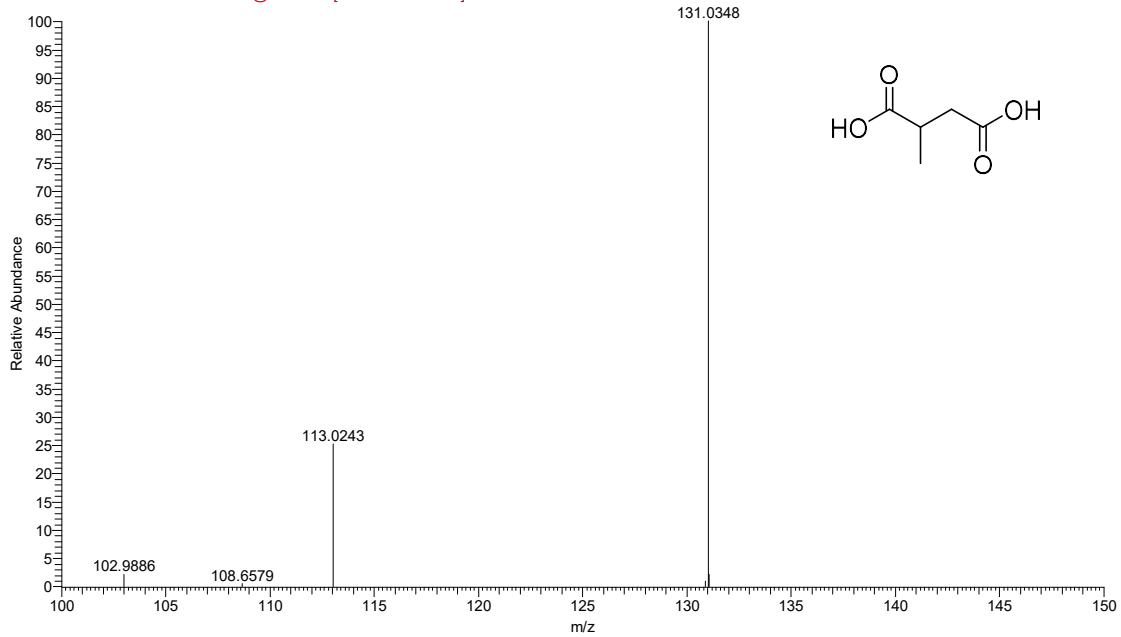

### 3-methylglutaricacid

S. crista Extracts\_Neg #914 RT: 2.38 AV: 1 NL: 1.75E6  
F: FTMS - c ESI d Full ms2 145.0519@hcd30.00 [50.0000-165.0000]

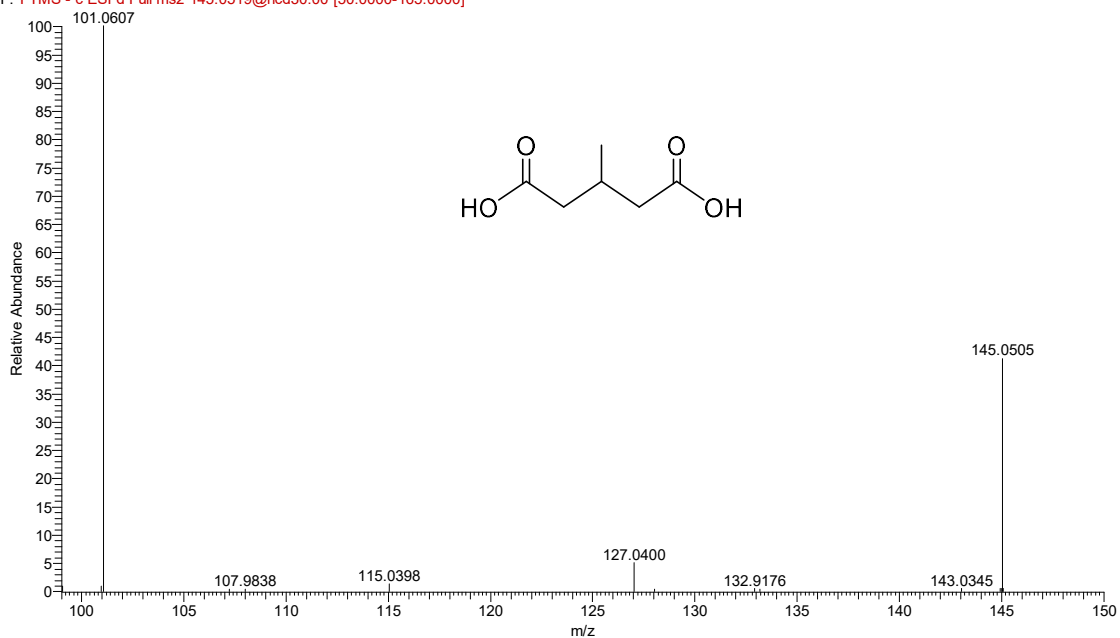

### 5'-deoxy-5'-methylthioadenosine

S. crista Extracts\_Pos #994 RT: 2.59 AV: 1 NL: 1.08E7  
F: FTMS + c ESI d Full ms2 298.0966@hcd30.00 [50.0000-320.0000]

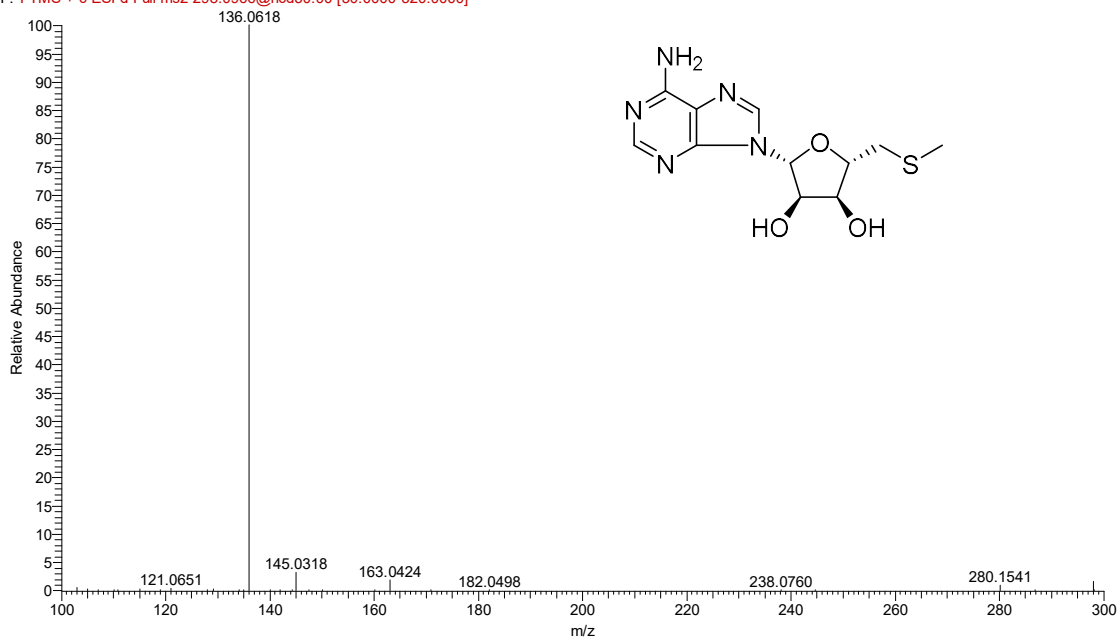

## 2-amino-octanedioic acid

S. crispa Extracts\_Neg #1236 RT: 3.22 AV: 1 NL: 2.60E6  
F: FTMS - c ESI d Full ms2 188.0926@hcd30.00 [50.0000-210.0000]

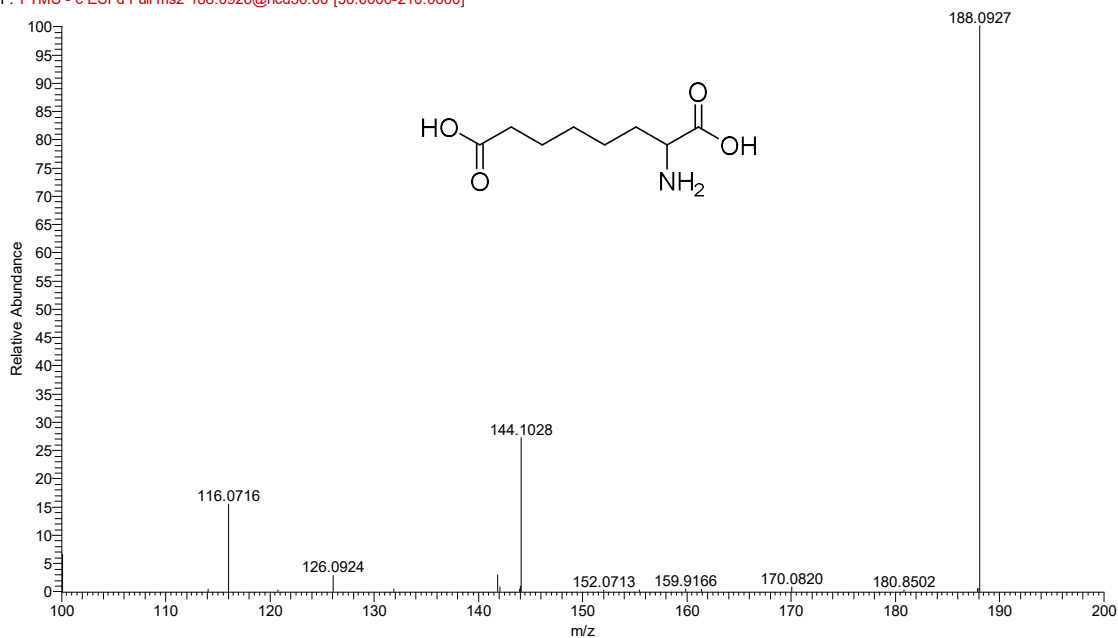

## 4-hydroxy-5,7-dimethoxy-1-isobenzofuranone

S. crispa Extracts\_Pos #1616 RT: 4.21 AV: 1 NL: 1.24E7  
F: FTMS + c ESI d Full ms2 211.0602@hcd30.00 [50.0000-235.0000]

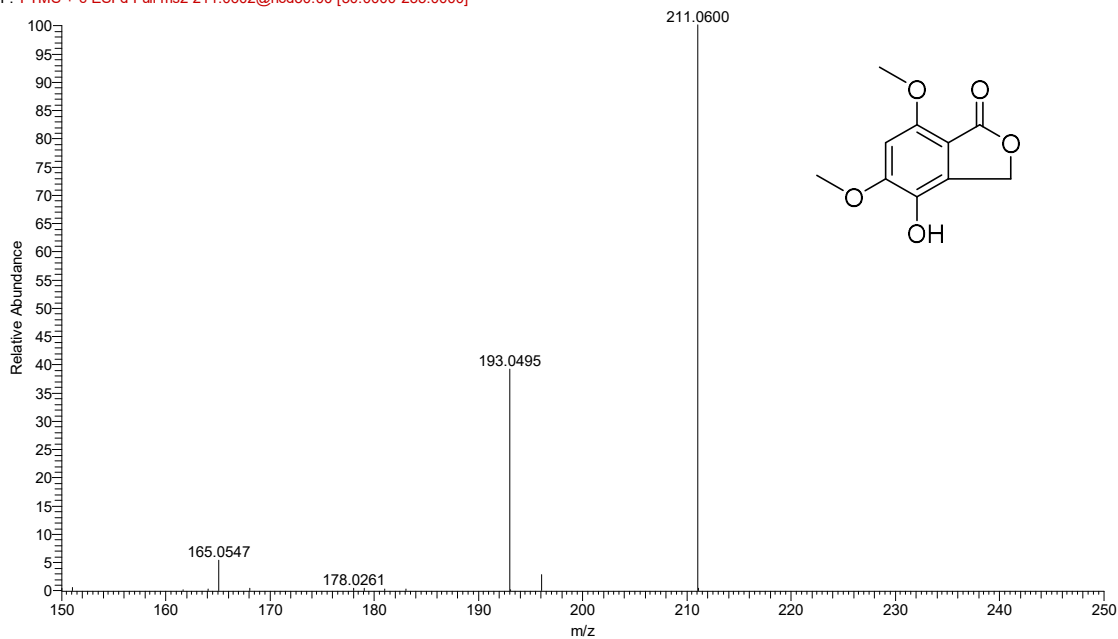



## glucitol

S. crispa Extracts\_Neg #2451 RT: 6.38 AV: 1 NL: 1.15E7  
F: FTMS - c ESI d Full ms2 181.0716@hcd30.00 [50.0000-200.0000]

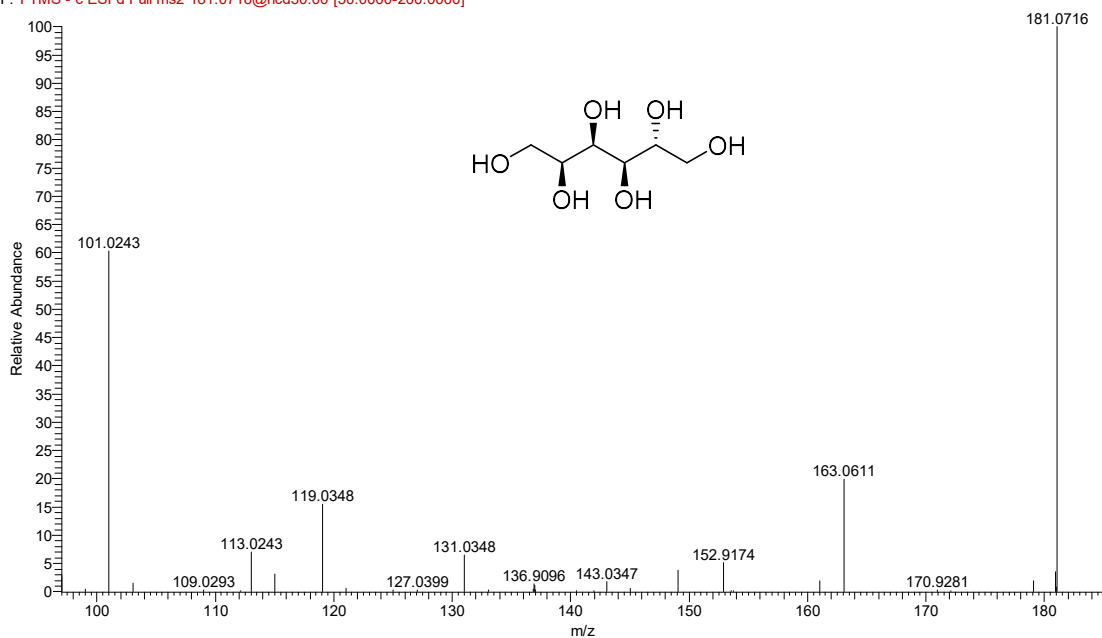

## 2-amino-1,3-dodecanediol

S. crispa Extracts\_Pos #2608 RT: 6.79 AV: 1 NL: 3.31E7  
F: FTMS + c ESI d Full ms2 218.2115@hcd30.00 [50.0000-240.0000]

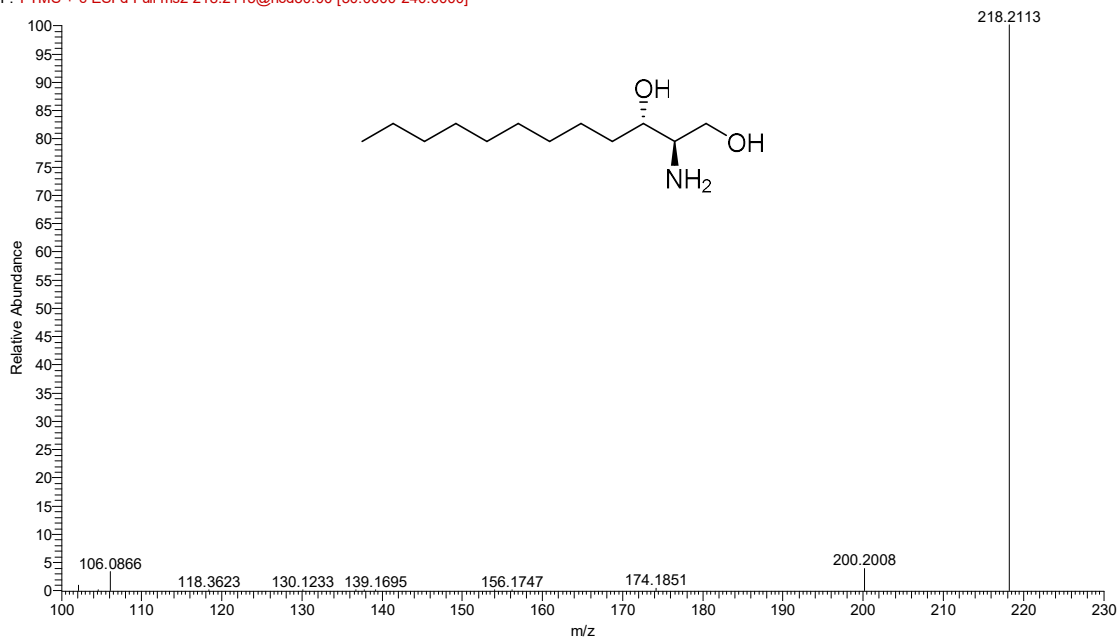

## stellarinC

S. crispa Extracts\_Pos #2621 RT: 6.83 AV: 1 NL: 4.99E5  
F: FTMS + c ESI d Full ms2 655.3087@hcd30.00 [50.0000-685.0000]

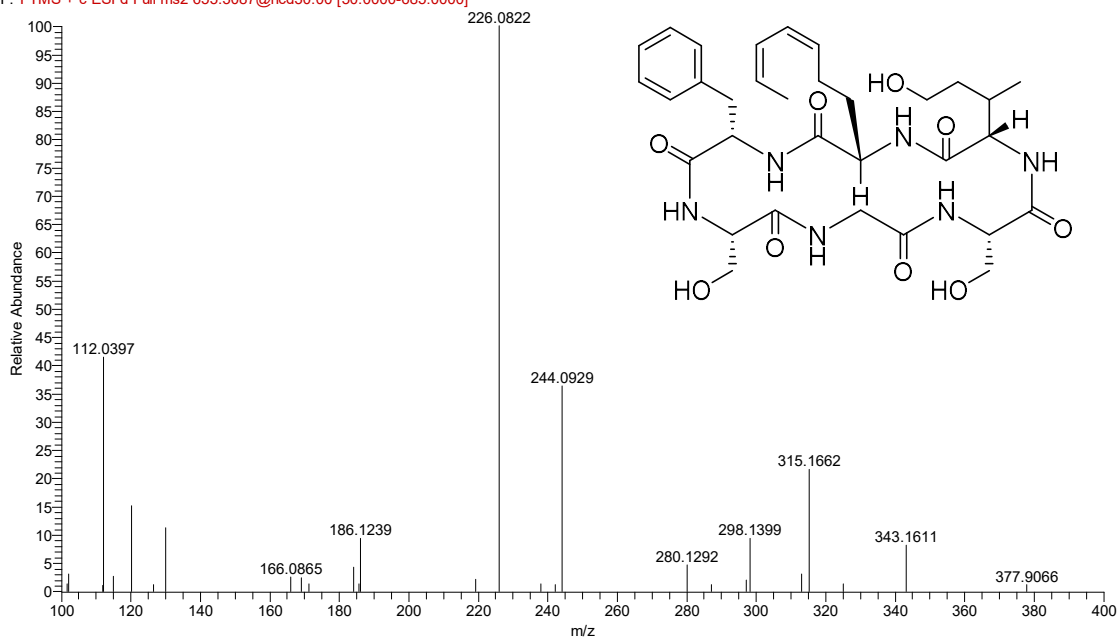

## 9-hydroxy-10,14-octadecadien-12-ynoic acid

S. crispa Extracts\_Pos #2993 RT: 7.79 AV: 1 NL: 1.05E5  
F: FTMS + c ESI d Full ms2 293.2111@hcd30.00 [50.0000-315.0000]

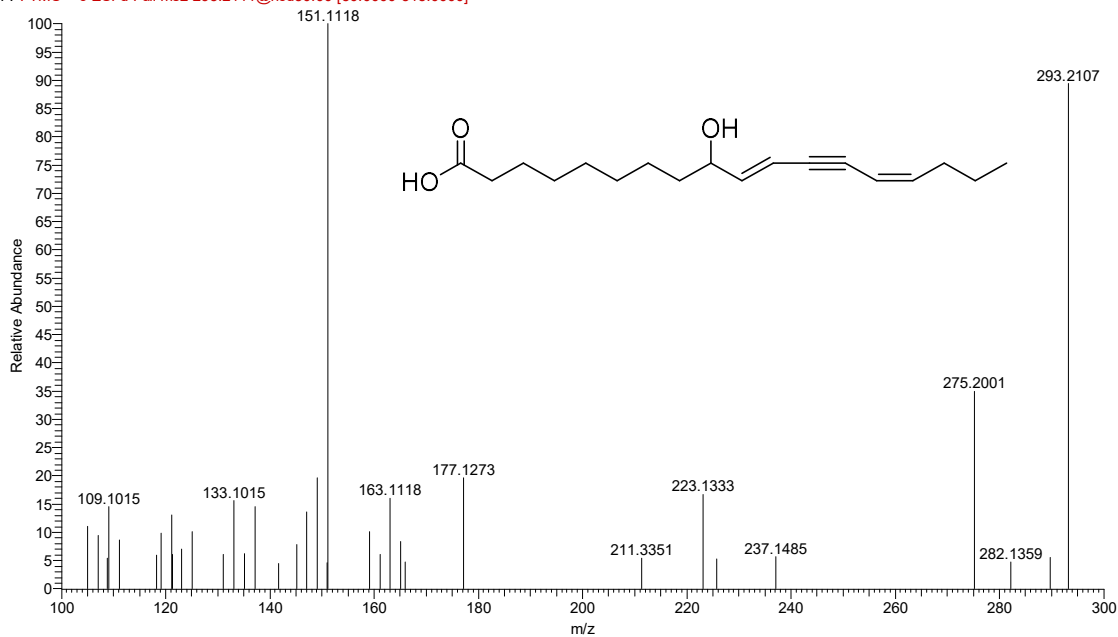

## clitocybulolC

S. crispa Extracts\_Neg #3197 RT: 8.32 AV: 1 NL: 7.28E5  
F: FTMS - c ESI d Full ms2 265.1480@hcd30.00 [50.0000-290.0000]

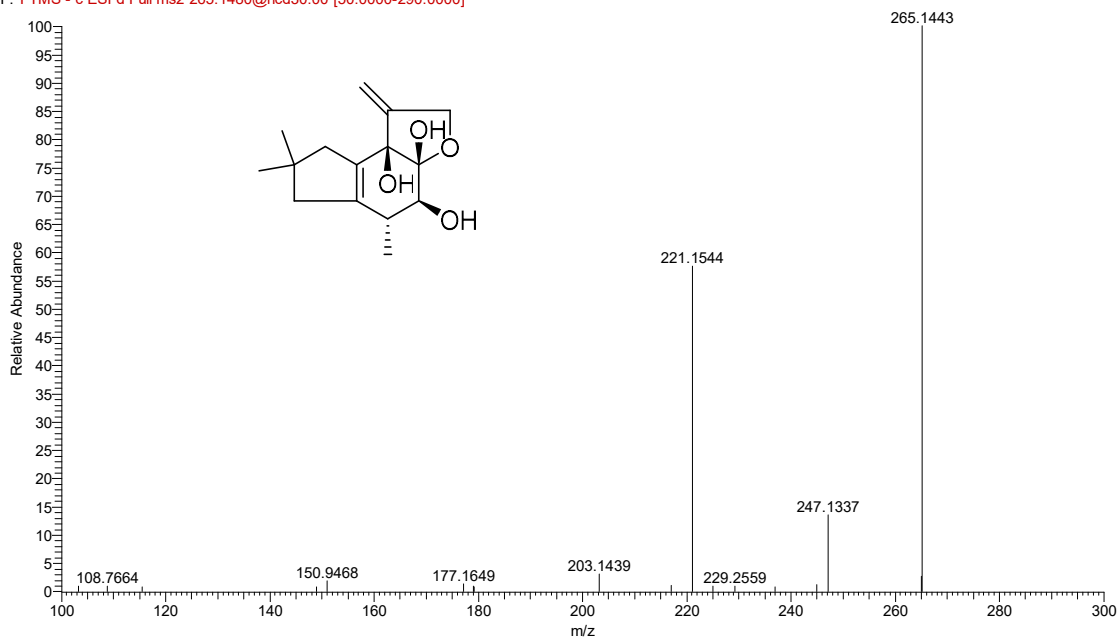

## 3 $\beta$ -hydroxy-11,12-O-isopropylidenedrimene

S. crispa Extracts\_Pos #3233 RT: 8.42 AV: 1 NL: 1.16E5  
F: FTMS + c ESI d Full ms2 295.2268@hcd30.00 [50.0000-320.0000]

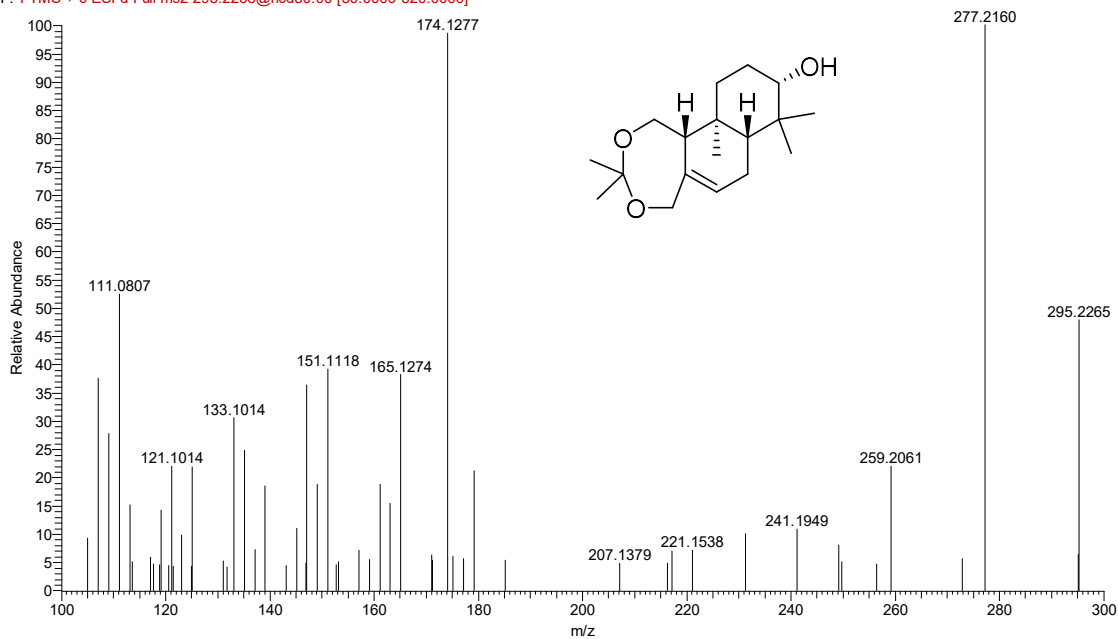

### 9,12,13-trihydroxy-15-octadecenoic acid

S. crista Extracts\_Neg #3266 RT: 8.50 AV: 1 NL: 4.95E6  
F: FTMS - c ESI d Full ms2 329.2331@hcd30.00 [50.0000-355.0000]

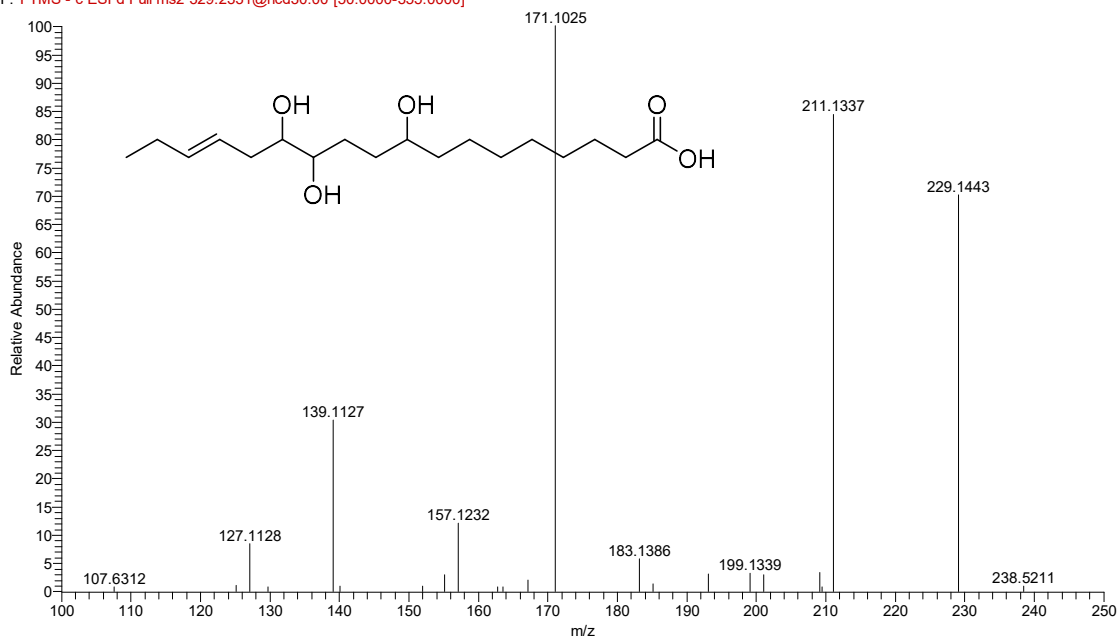

### 5,8-dihydroxy-9,12-octadecadienoic acid

S. crista Extracts\_Neg #3704 RT: 9.64 AV: 1 NL: 2.92E6  
F: FTMS - c ESI d Full ms2 311.2225@hcd30.00 [50.0000-335.0000]

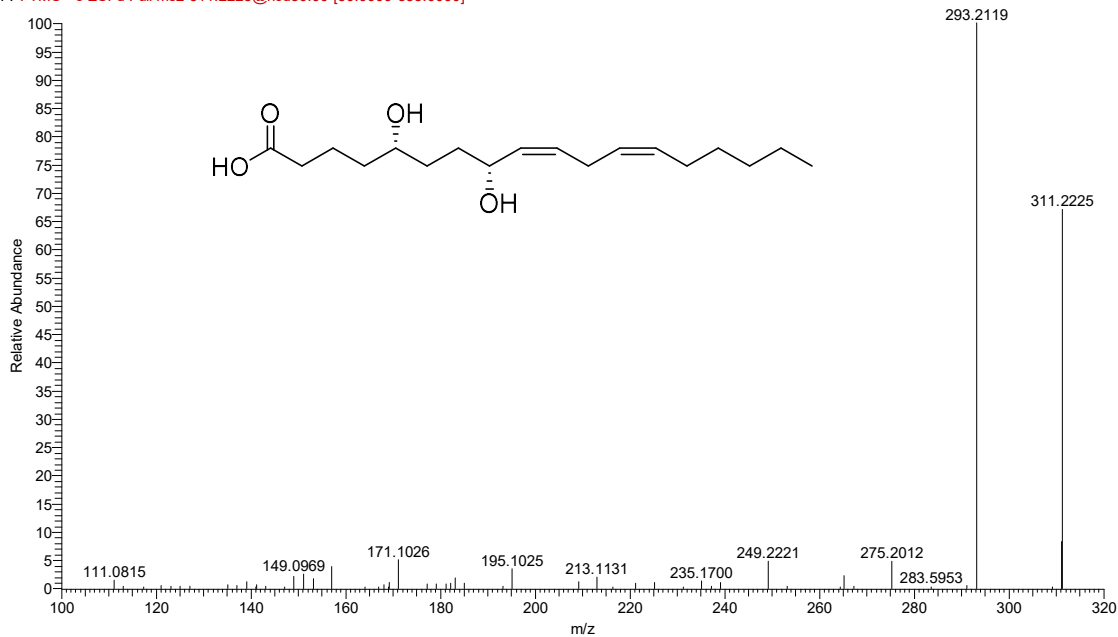

## porrigenicacid

S. crispa Extracts\_Neg #4000 RT: 10.41 AV: 1 NL: 3.19E5  
F: FTMS - c ESI d Full ms2 309.2067@hcd30.00 [50.0000-335.0000]

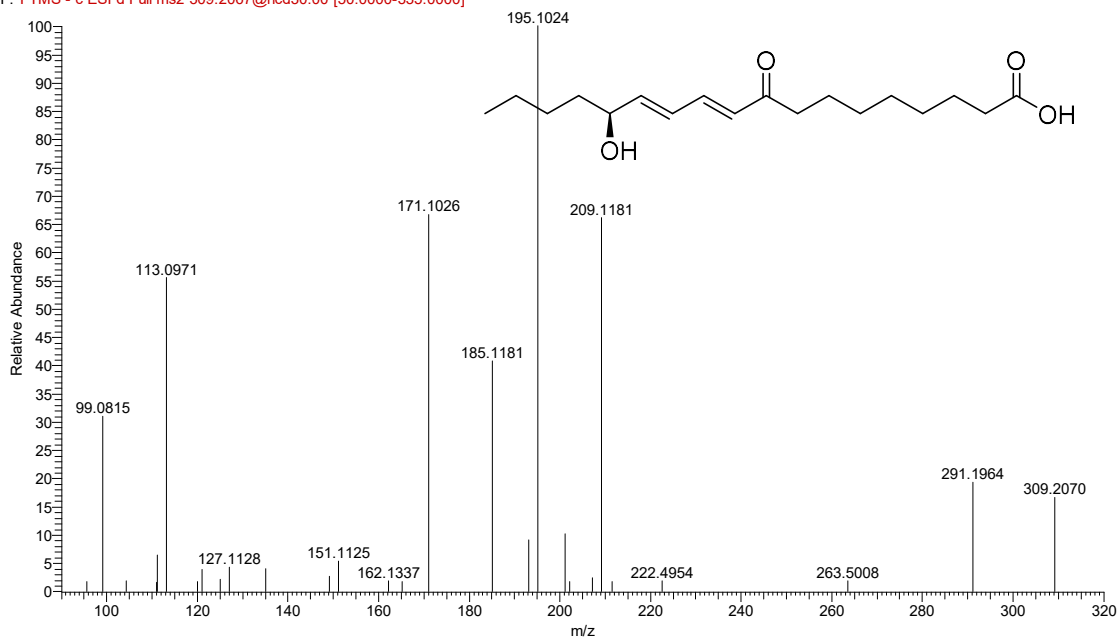

## 12-oxo-phytodienoicacid

S. crispa Extracts\_Pos #4096 RT: 10.66 AV: 1 NL: 1.79E5  
F: FTMS + c ESI d Full ms2 293.2111@hcd30.00 [50.0000-315.0000]

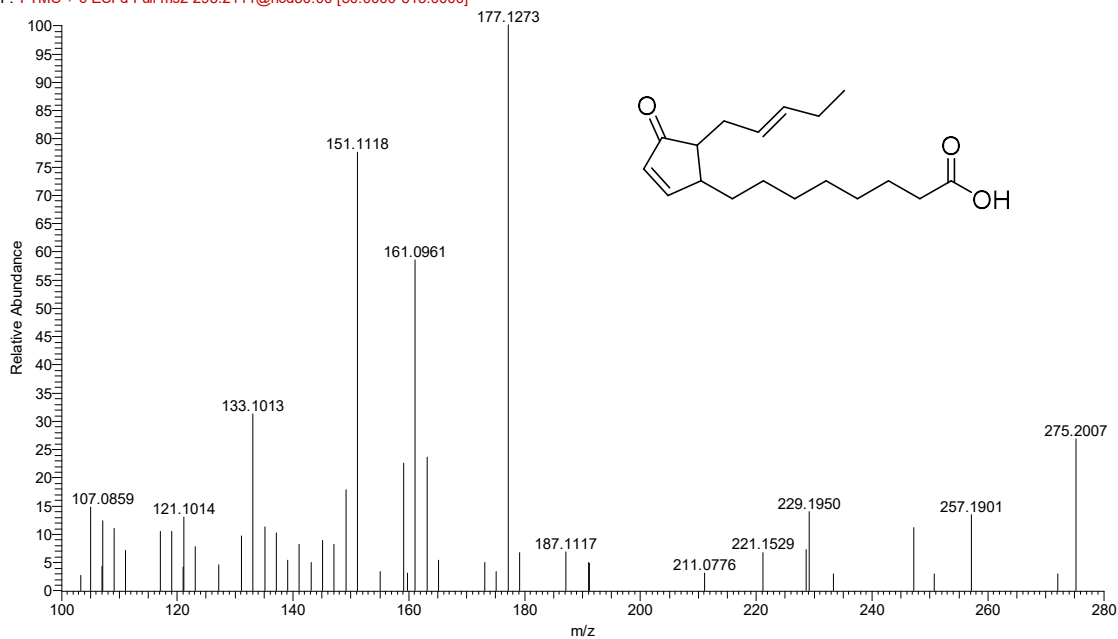

## nicandroseE

S. crista Extracts\_Neg #4792 RT: 12.47 AV: 1 NL: 3.23E6  
F: FTMS - c ESI d Full ms2 649.3436@hcd30.00 [50.0000-680.0000]

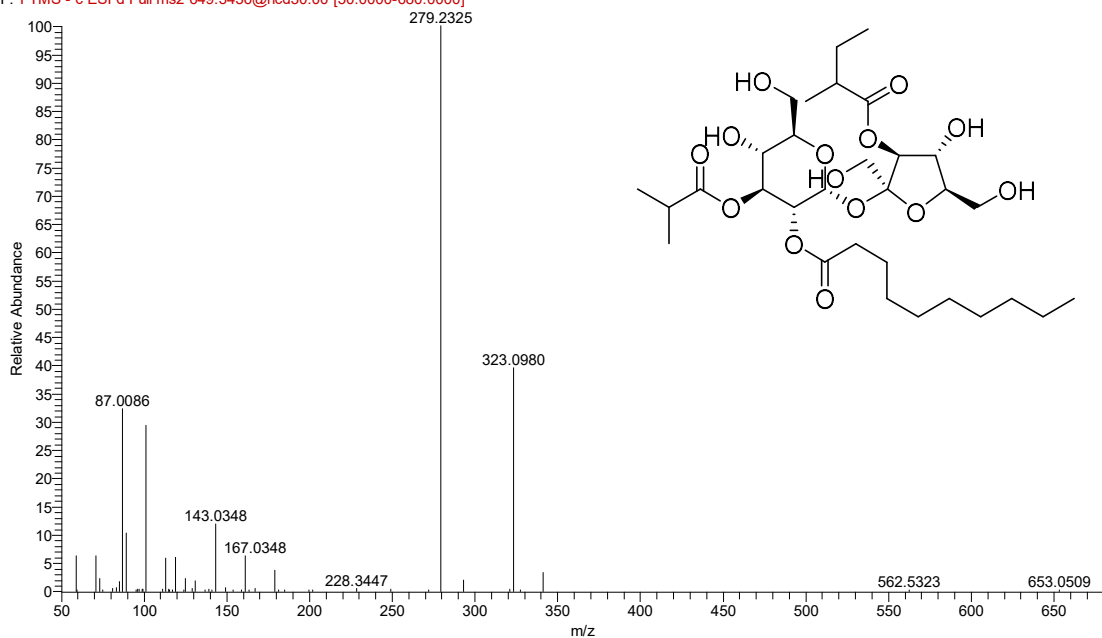

## 1,3-di(isobutoxycarbonyl)-2,4,4-trimethylpentane

S. crista Extracts\_Neg #4934 RT: 12.84 AV: 1 NL: 3.08E6  
F: FTMS - c ESI d Full ms2 313.2382@hcd30.00 [50.0000-335.0000]

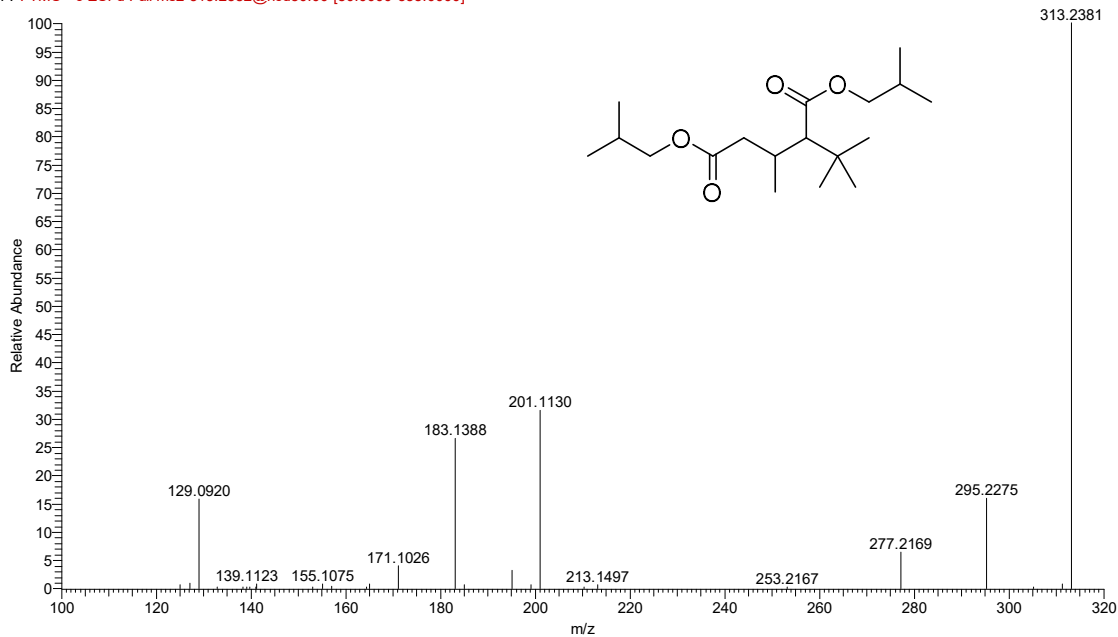

### 10-hydroxy-8,12-octadecadienoic acid

S. crispa Extracts\_Neg #6246 RT: 16.26 AV: 1 NL: 3.10E5  
F: FTMS - c ESI d Full ms2 295.2275@hcd30.00 [50.0000-620.0000]

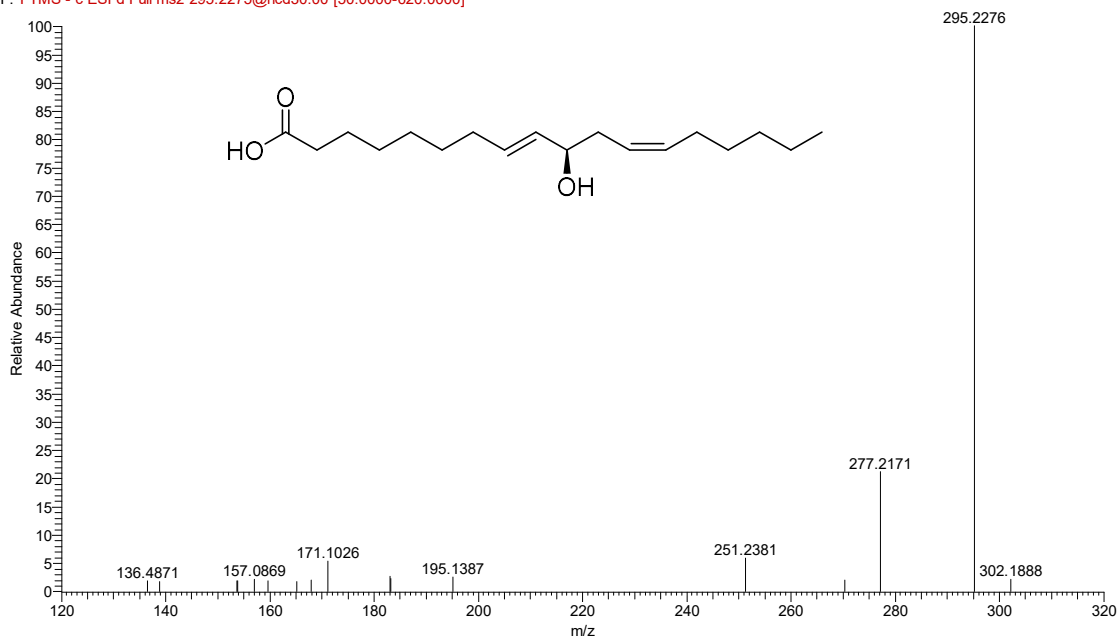

### 3-hydroxy-2-[[*(9Z)*-1-oxo-9-hexadecen-1-yl]oxy]propyl-β-D-galactopyranoside

S. crispa Extracts\_Neg #5378 RT: 14.00 AV: 1 NL: 6.45E6  
F: FTMS - c ESI d Full ms2 489.3066@hcd30.00 [50.0000-515.0000]

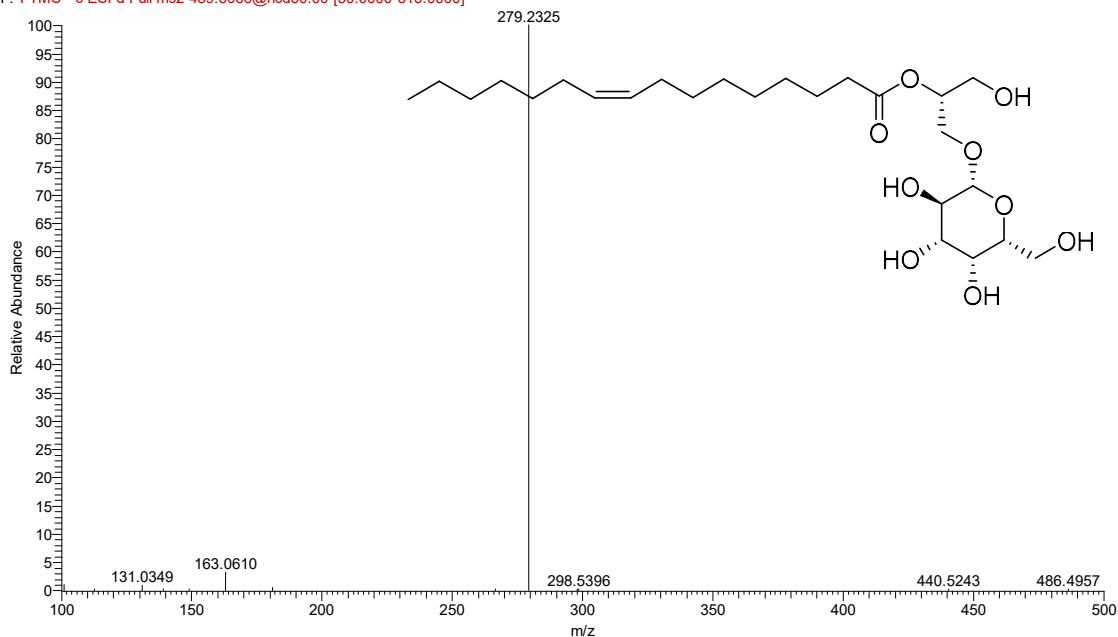

## 6,7-epoxystearic acid

S. crista Extracts\_Neg #5570 RT: 14.50 AV: 1 NL: 3.52E7  
F: FTMS - c ESI d Full ms2 297.2430@hcd30.00 [50.0000-320.0000]

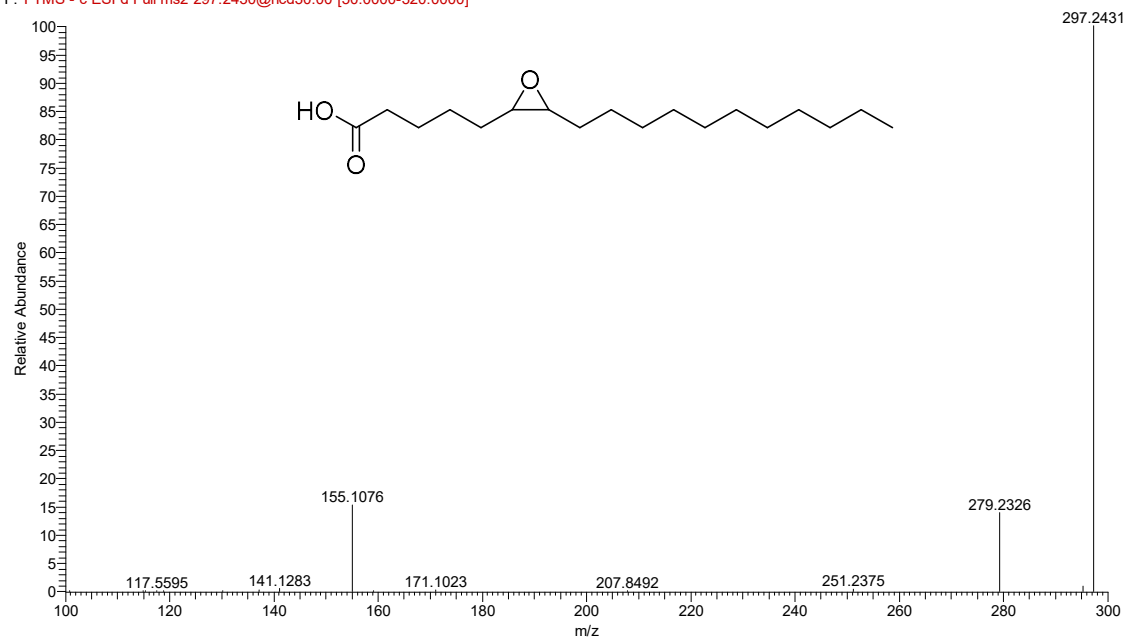

## 1-(9-octadecenoate)- $\beta$ -D-glucopyranose

S. crista Extracts\_Pos #6615 RT: 17.22 AV: 1 NL: 2.24E4  
F: FTMS + c ESI d Full ms2 445.3161@hcd30.00 [50.0000-470.0000]

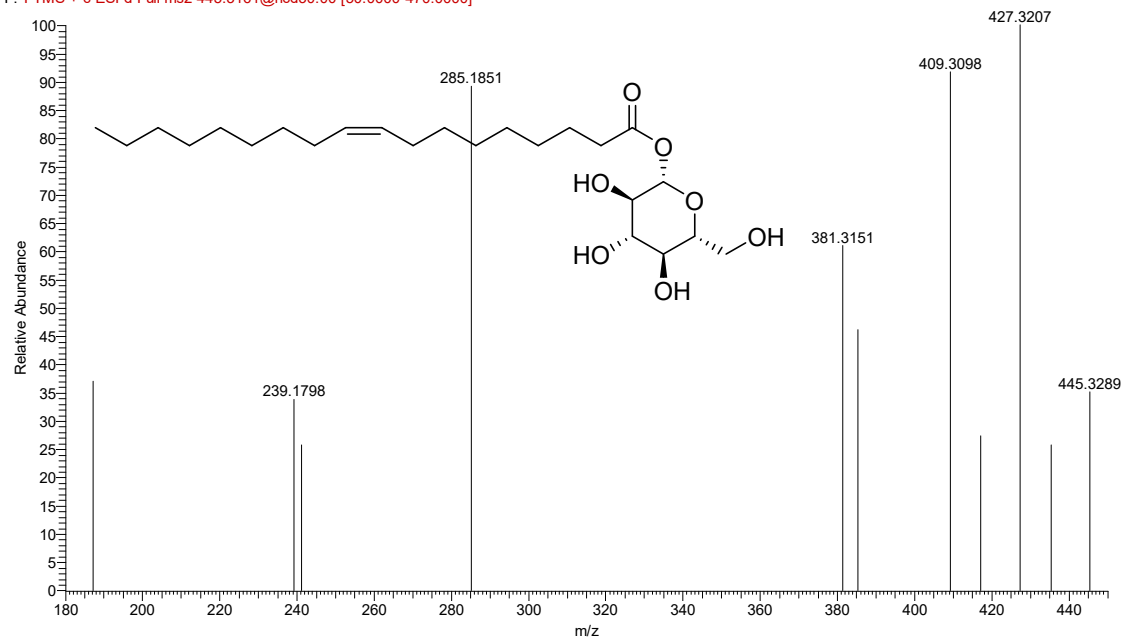



## 2,3-seco-2,3-dicarboxyplatanicacid

S. crispa Extracts\_Neg #5566 RT: 14.49 AV: 1 NL: 1.02E4  
F: FTMS - c ESI d Full ms2 503.3010@hcd30.00 [50.0000-530.0000]

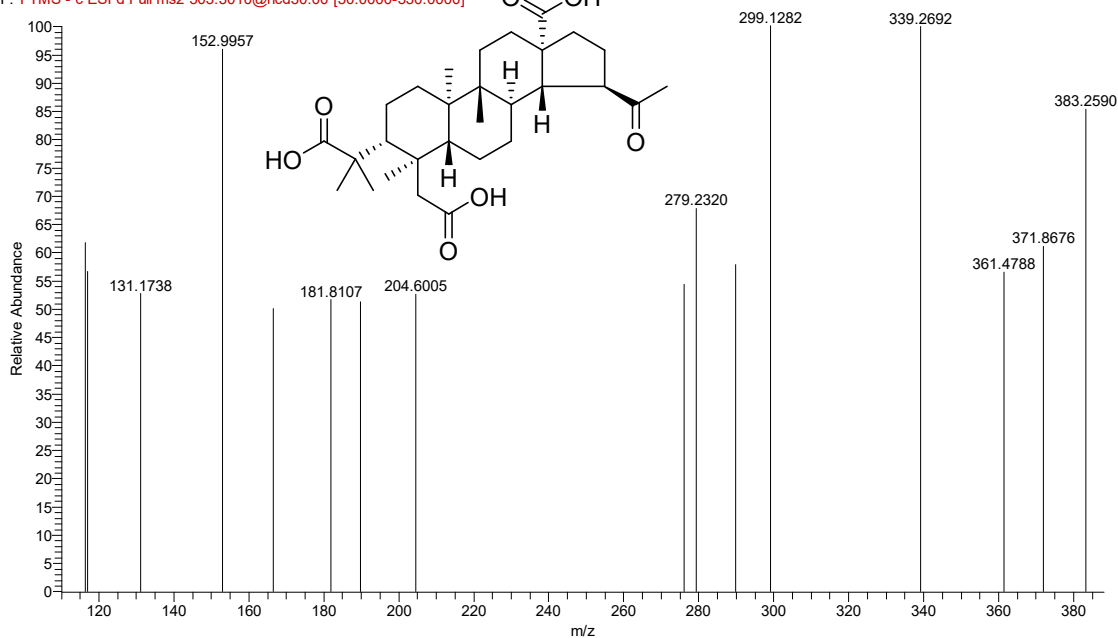

## ganoderasideD

S. crispa Extracts\_Pos #5745 RT: 14.96 AV: 1 NL: 2.62E5  
F: FTMS + c ESI d Full ms2 409.3099@hcd30.00 [50.0000-435.0000]

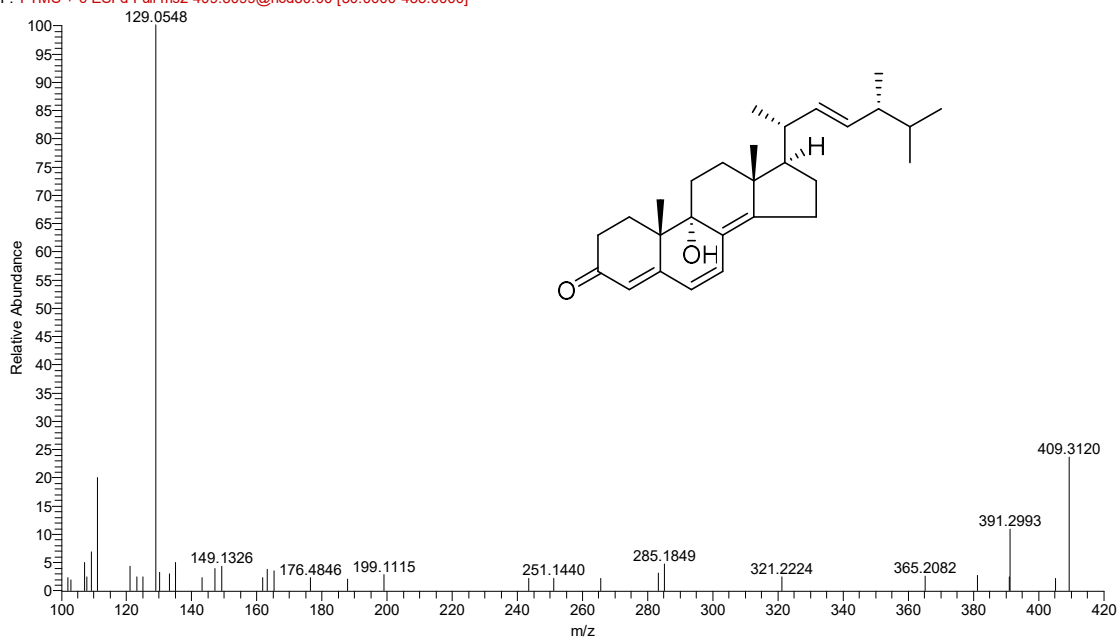

## (5 $\alpha$ ,6 $\alpha$ )-epoxy-ergosta-8(14),22-diene-3 $\beta$ ,7 $\beta$ -diol

S. crispa Extracts\_Pos #6580 RT: 17.13 AV: 1 NL: 3.69E4  
F: FTMS + c ESI d Full ms2 429.3361@hcd30.00 [50.0000-455.0000]

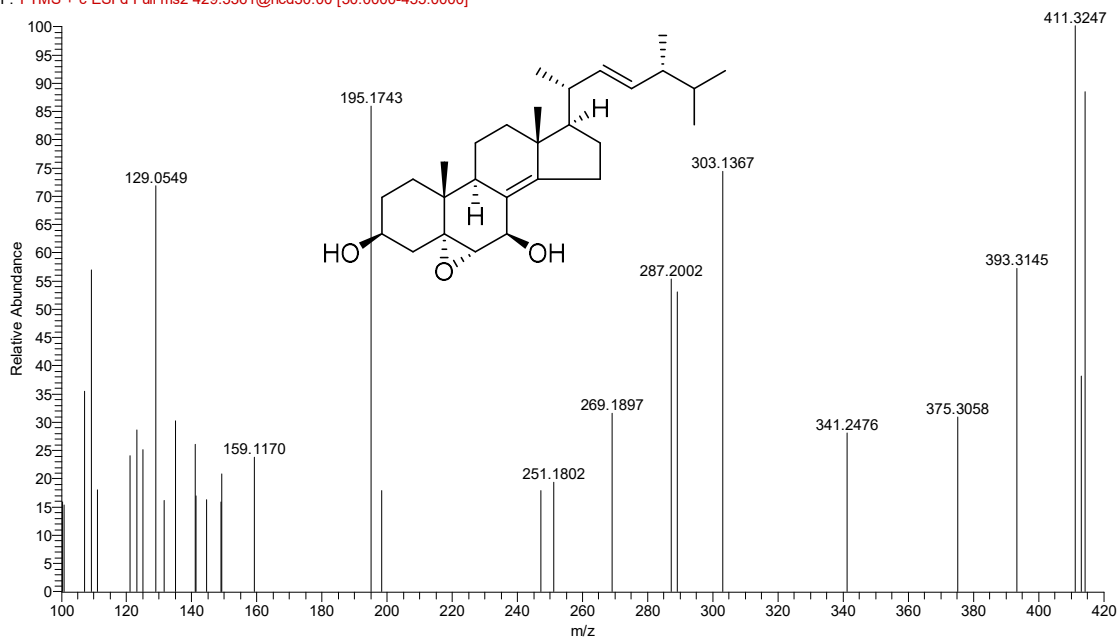

## ergone

S. crispa Extracts\_Pos #7028 RT: 18.30 AV: 1 NL: 5.65E5  
F: FTMS + c ESI d Full ms2 393.3154@hcd30.00 [50.0000-420.0000]

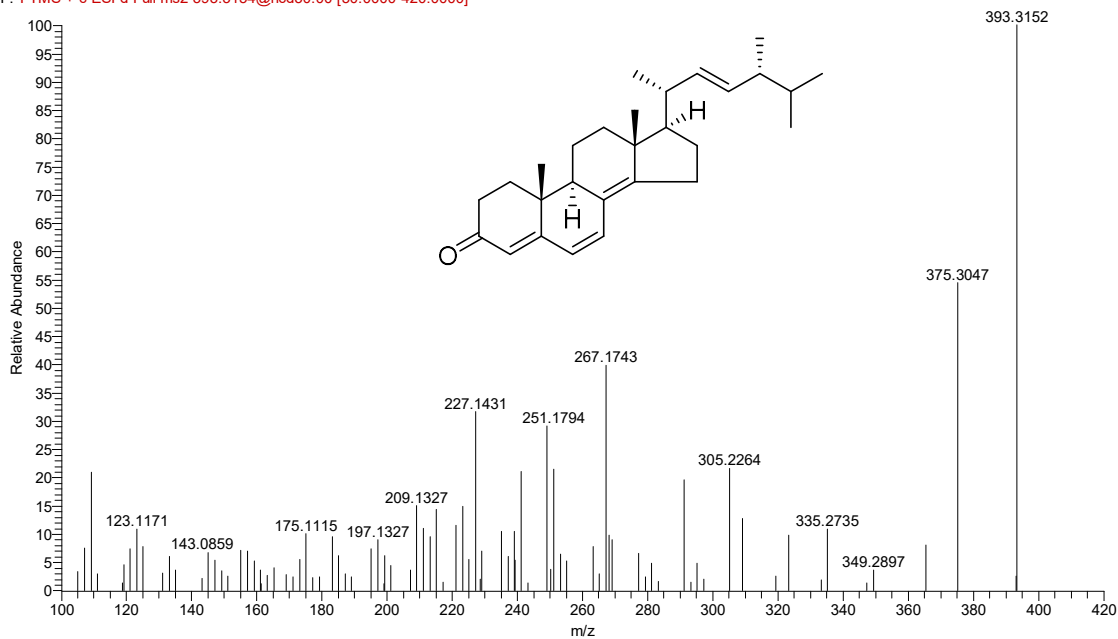

## linoleic acid

S. crista Extracts\_Neg #6758 RT: 17.59 AV: 1 NL: 1.39E7  
F: FTMS - c ESI d Full ms2 279.2326@hcd30.00 [50.0000-305.0000]

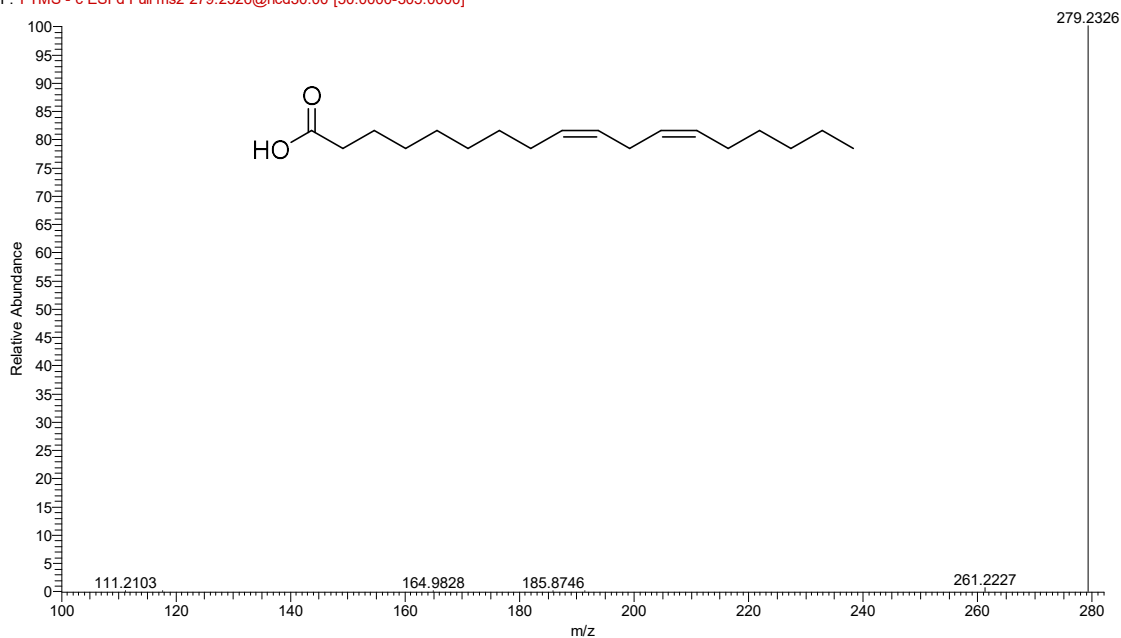

## oleamide

S. crista Extracts\_Pos #6862 RT: 17.86 AV: 1 NL: 2.28E5  
F: FTMS + c ESI d Full ms2 282.2790@hcd30.00 [50.0000-305.0000]

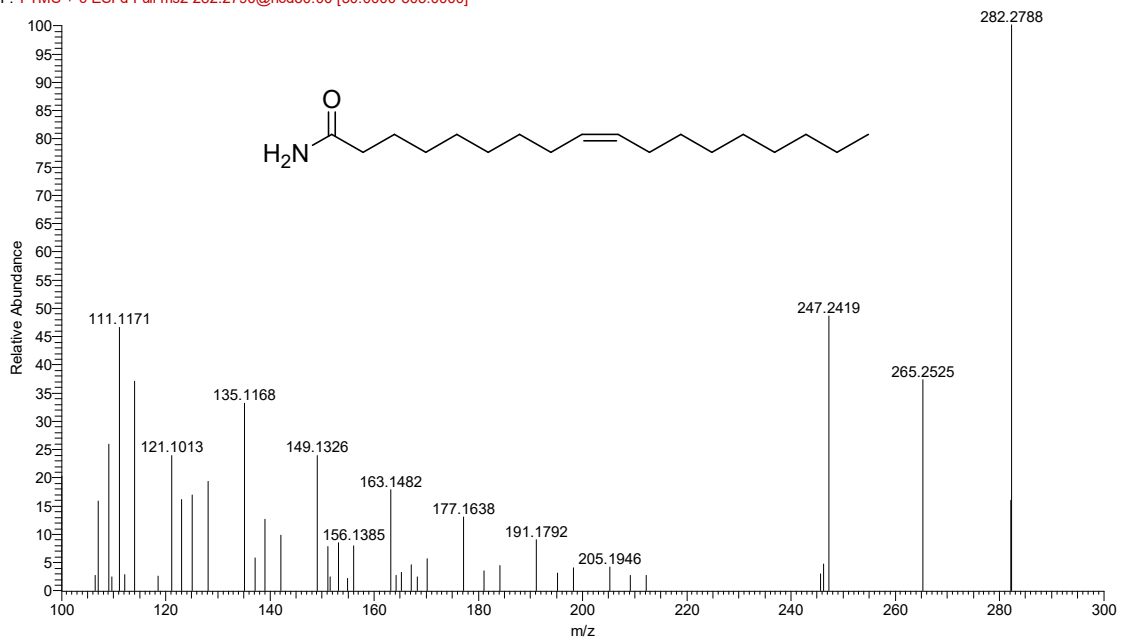

## ergosterolperoxide

S. crispa Extracts\_Pos #7436 RT: 19.36 AV: 1 NL: 7.17E4  
F: FTMS + c ESI d Full ms2 429.3361@hcd30.00 [50.0000-455.0000]

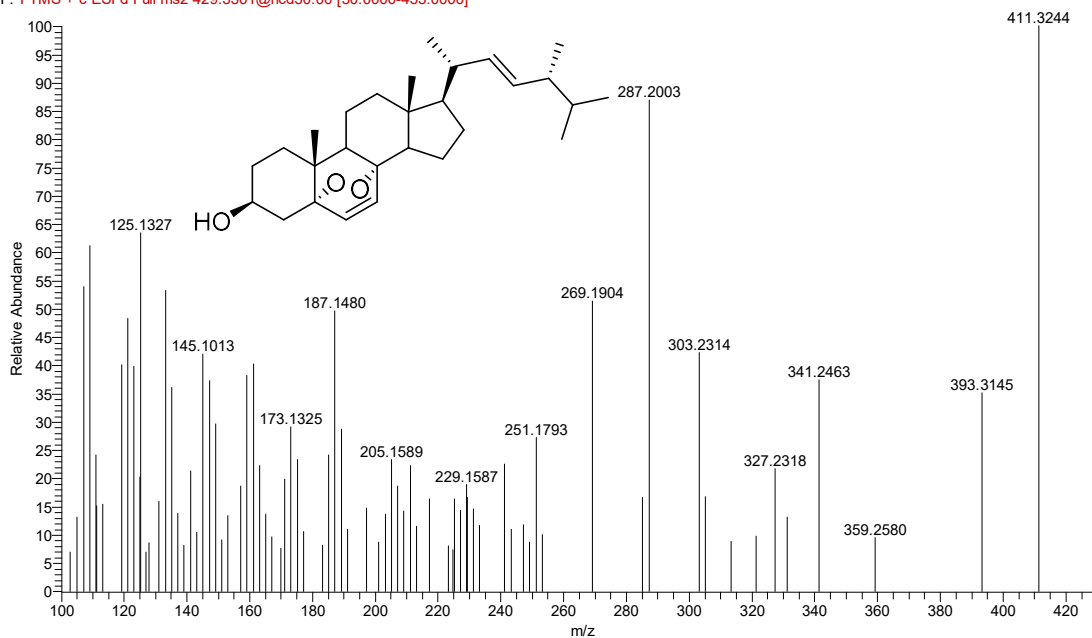

## ergosta-5,8,22-triene-3,11-dione

S. crispa Extracts\_Pos #6394 RT: 16.65 AV: 1 NL: 3.44E5  
F: FTMS + c ESI d Full ms2 409.3099@hcd30.00 [50.0000-435.0000]

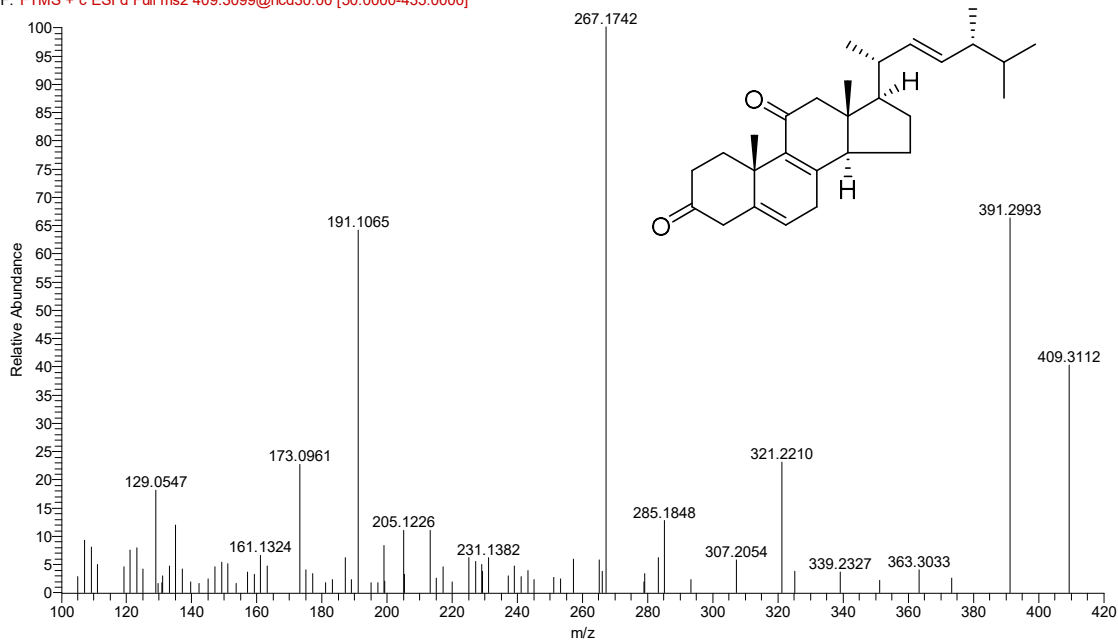

## thraustochytrosideA

S. crispa Extracts\_Pos #8265 RT: 21.52 AV: 1 NL: 8.19E6  
F: FTMS + c ESI d Full ms2 710.5563@hcd30.00 [50.0000-740.0000]

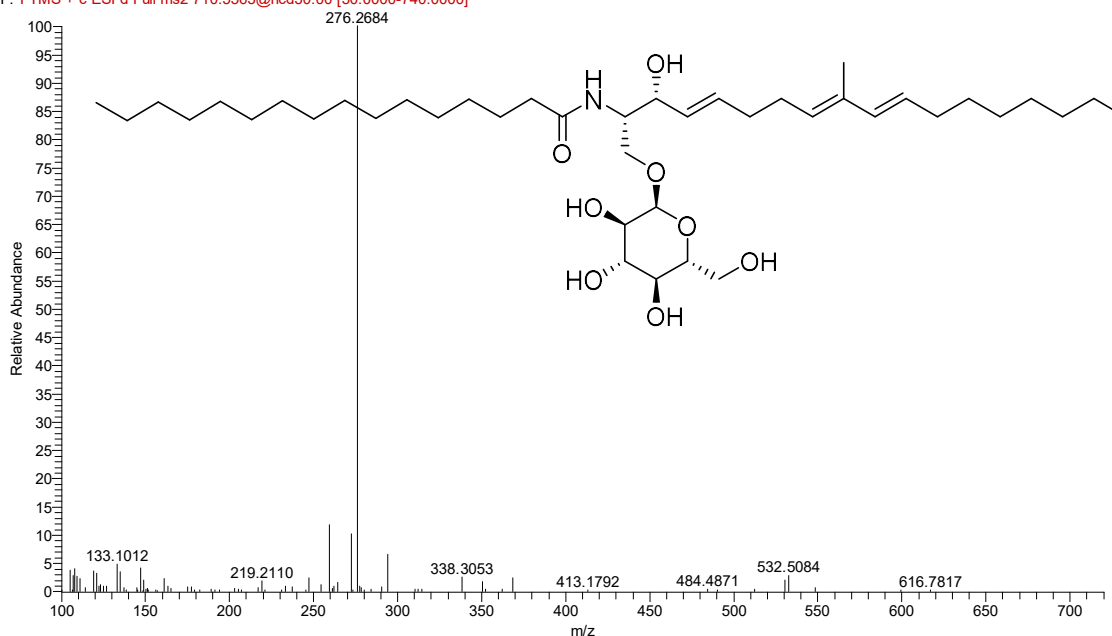

## erucamide

S. crispa Extracts\_Pos #8408 RT: 21.89 AV: 1 NL: 1.23E6  
F: FTMS + c ESI d Full ms2 338.3415@hcd30.00 [50.0000-365.0000]

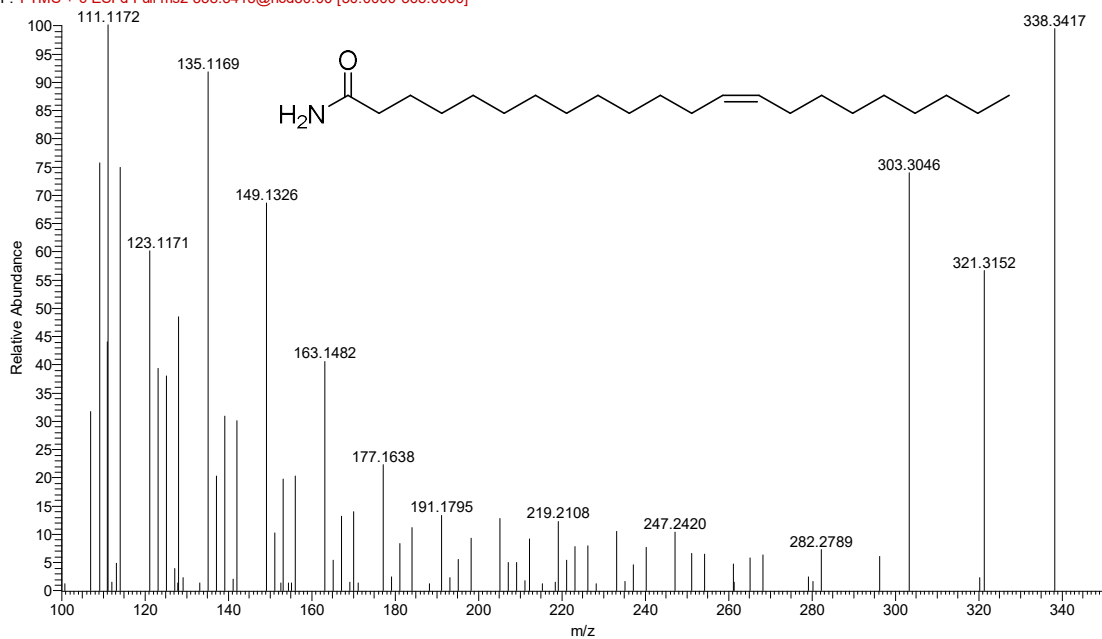

# 1-(hydroxymethyl)-2-[(1-oxohexadecyl)oxy]ethyl-ester-9,12-heptadecadienoic acid

S. crispa Extracts\_Neg #8612 RT: 22.43 AV: 1 NL: 3.18E6

F: FTMS - c ESI d Full ms2 577.4834@hcd30.00 [50.0000-605.0000]

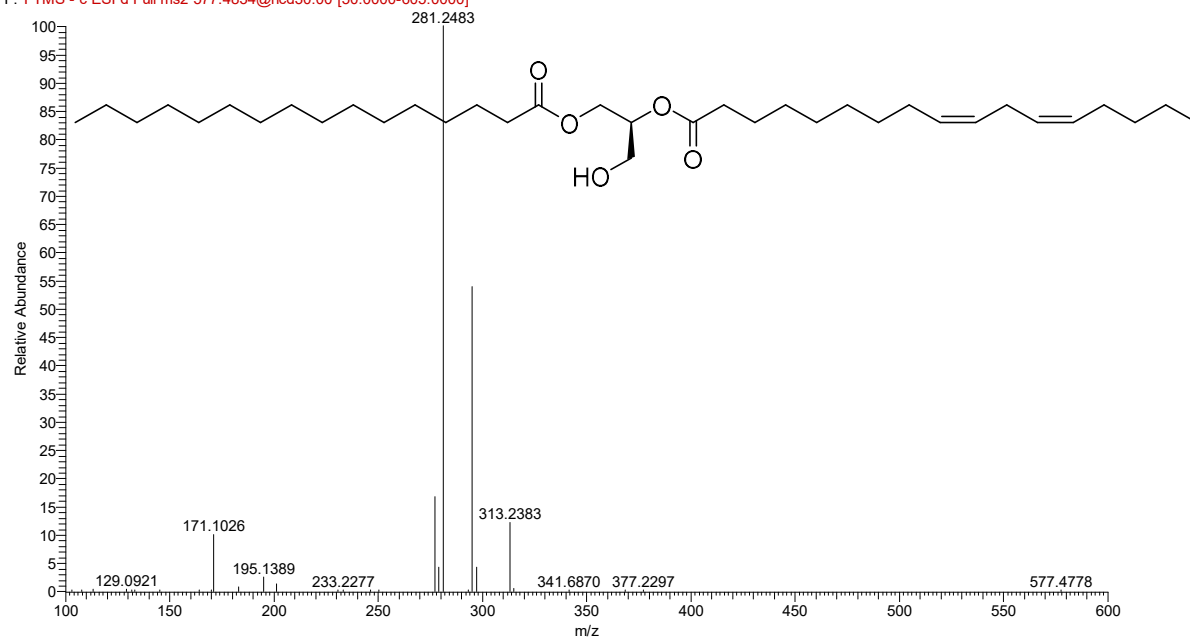

**Figure S8.** Chemical structures and available raw MS<sup>2</sup> spectra of some components identified from *S. crispa*
